# Supplementary material for: Expanding automated multiconformer ligand modeling to macrocycles and fragments
Source: eLife. 2025 Jun 30;14:RP103797. doi: 10.7554/eLife.103797 (PMC12208665; doi:10.7554/eLife.103797)
Supplement: Supplementary file 1. [file elife-103797-supp1.xlsx]

## Sheet: Sheet1
PDB	Chain	Residue Number	SMILES	Ligand Name	Modified True Positive RSCC	qFit-ligand RSCC	Modified True Positive Strain	qFit-ligand Strain	Modified True positive EDIAm	qFit-ligand EDIAm	New qFit-ligand Number of Conformers	Resolution	Old qFit-ligand RSCC	Old qFit-ligand Strain	Old qFit-ligand EDIAm	Refined qFit Rfree	Refined qFit Rwork
8BSD	A	7220	c1cn(c2c1c(ncn2)N)C3C(C(C(O3)CO)O)O	TBN	0.697184	0.760179	1.68826	1.68352	0.465415	0.787217	3	1.95	0.901473	1.70494	0.674972	0.3152	0.2912
7T1A	A	802	c1nc(c2c(n1)n(cn2)C3CC(C(O3)COP(=O)(O)OP(=O)(O)OP(=O)(O)O)O)N	DTP	0.815587	0.851447	5.45505	5.23886	0.145996	0.363581	3	1.81	0.841587	5.05961	0.131173	0.225	0.198
1FD7	N	104	c1ccc(cc1)CNC(=O)c2cccc(c2)OC3C(C(C(C(O3)CO)O)O)O	AI1	0.826357	0.844786	7.21101	6.83509	0.552717	0.435613	2	1.8	0.855667	7.58147	0.360861	0.178	0.146
5TIW	A	302	CC(C)NCC1CCc2cc(c(cc2N1)[N+](=O)[O-])CO	OAQ	0.885209	0.920405	3.34238	4.10523	0.27246	0.568554	3	1.66	0.89038	3.8405	0.324354	0.202	0.174
5AEH	A	1170	COc1ccc(cc1)C(=O)Nc2ccc(cc2)C(=O)N(c3ccccc3Cl)c4ccncn4	8IR	0.777859	0.777859	10.1761	8.67408	0.834298	0.941458	1	1.85	0.856181	11.4147	0.503507	0.255	0.229
7QDQ	A	207	CC(C)Oc1cc(ccc1C2=NC(C(N2C(=O)N3CCNC(=O)C3)c4ccc(c(c4)Cl)Cl)c5ccc(c(c5)Cl)Cl)OC	AU0	0.888288	0.905488	13.4302	13.1672	0.885373	0.616054	2	1.26	0.925097	14.7891	0.704186	0.225	0.188
7VDU	A	301	c1cc(c(cc1n2ccc(n2)CO)F)Nc3cc4c(ccc(n4)OC5CCNCC5)cn3	65L	0.896749	0.915717	7.68321	7.60361	0.438202	0.646861	2	1.53	0.918429	7.68795	0.431276	0.202	0.19
1Q63	A	900	c1cnc([nH]1)SCc2cc(cc3c2N=C(NC3=O)N)N	AIQ	0.797397	0.879942	0.763382	1.31604	0.169869	0.237118	3	1.85	0.848964	1.23784	0.285344	0.183	0.157
7MYR	B	401	c1cnsc1C23CN(CC2CSC(=N3)N)c4ncc(cn4)F	ZRD	0.931247	0.946034	2.32638	3.17104	0.94091	0.9969	2	1.72	0.925009	1.52521	0.90723	0.191	0.164
6B1F	B	301	C1CC(N(CC1NOS(=O)(=O)O)C=O)C#N	C8Y	0.856698	0.891942	7.08765	6.96938	0.747682	0.835957	3	1.44	0.868012	7.70628	0.757021	0.169	0.131
1Z4I	A	1001	C1C(C(OC1N2C=CC(=O)NC2=O)COP(=O)(O)O)O	UMP	0.8478	0.865803	1.97714	1.91313	0.811548	0.94361	2	1.98	0.840141	2.10648	0.73148	0.2	0.161
5HH1	A	201	CC(C)(COP(=O)(O)OP(=O)(O)OCC1C(C(C(O1)n2cnc3c2ncnc3N)O)OP(=O)(O)O)C(C(=O)NCCC(=O)NCCS)O	COA	0.918048	0.918048	11.338	11.3165	0.419307	0.714167	1	1.803	0.619805	18.6722	0.288008	0.214	0.182
6GNW	C	201	c1c(c(cc(c1Cl)Cl)Cl)OCC(=O)O	F52	0.774093	0.856034	0.842605	1.61622	0.538747	0.802981	2	1.75	0.81783	2.06736	0.450649	0.2	0.179
2ABS	A	1001	c1nc(c2c(n1)n(cn2)C3C(C(C(O3)COP(=O)(O)OP(=O)(CP(=O)(O)O)O)O)O)N	ACP	0.78846	0.85251	3.59998	3.30259	0.268255	0.435504	3	1.1	0.895649	3.56753	0.411912	0.173	0.155
6HOF	A	301	c1ccc(cc1)S(=O)(=O)NCc2nc(cs2)c3ccc(cc3)C(=O)NCCC(F)(F)F	GJ8	0.860151	0.881792	3.57718	3.22817	0.274557	0.439861	2	1.8	0.855386	5.5638	0.241229	0.204	0.185
5P9E	A	304	c1ccc(cc1)Cc2nc([nH]n2)CCNC(=O)c3cc(cc(c3O)O)c4ccc(cc4)F	77S	0.847267	0.847267	2.88293	2.62316	0.801539	0.900817	1	1.5	0.840016	4.1527	0.738567	0.163	0.125
6CYQ	E	301	CON=C(c1csc(n1)N)C(=O)NC(C2N=C(C(=C)CS2)C(=O)O)C(=O)O	CE4	0.854417	0.860313	21.9337	16.6081	0.653769	0.56445	1	1.698	0.86166	20.9481	0.554586	0.204	0.177
6HEX	A	1000	Cc1ccc(cc1Nc2c3cnn(c3nc(n2)c4cnccn4)C)C(=O)Nc5cccc(c5)C(F)(F)F	G02	0.857366	0.887803	7.51057	7.50658	0.807596	0.863127	2	1.413	0.919673	7.45998	0.478482	0.167	0.141
7K2U	A	403	Cc1c(c2cc(ccc2nc1c3ccc(cc3)c4ccccc4F)F)C(=O)NOC	VU7	0.857844	0.879256	7.38906	7.46526	0.748953	0.804285	3	1.73	0.863514	10.0694	0.628109	0.19	0.171
8H2F	A	401	CC1=CN(C(=O)NC1=O)C2CC(C(O2)COP(=O)(O)O)O	TMP	0.854924	0.854924	2.27842	2.29747	0.641415	0.586734	2	1.448	0.819467	2.17869	0.429593	0.171	0.151
5FNL	A	1264	c1cc(cc(c1)COc2cccc(c2)C=CC(=O)O)CC(=O)O	5ON	0.787936	0.807334	2.3581	2.47642	0.252513	0.363616	2	1.59	0.505904	2.39203	0.183767	0.198	0.16
7L0K	A	1001	Cc1c(c[nH]c1C(=O)NC(C)c2cc([nH]n2)C(=O)N)Cc3ccc(nc3)C(F)(F)F	XE7	0.865939	0.880757	7.40609	7.29472	0.74084	0.890063	2	1.96	0.916427	9.65833	0.73468	0.217	0.194
5LPL	A	1201	CCc1c(c([nH]c1C(=O)NC2c3cc(ccc3CCC2O)Cl)C)C(=O)C	71X	0.689017	0.660383	5.57833	5.69733	0.497023	0.813092	3	1.65	0.742902	6.37923	0.543175	0.314	0.28
1LL9	B	964	CC1(C(NC(S1)C(C=O)NC(=O)C(c2ccc(cc2)O)N)C(=O)O)C	AXL	0.812372	0.812372	12.9671	13.0328	0.201661	0.173438	1	1.87	0.69205	14.0021	0.110734	0.196	0.168
1HF3	B	402	c1cc(c[n+](c1)C2C(C(C(O2)COP(=O)([O-])OP(=O)(O)OCC3C(C(C(O3)n4cnc5c4ncnc5N)O)O)O)O)C(=O)N	NAD	0.906831	0.906831	9.75929	9.34821	0.927436	0.992514	1	1.95	0.877487	9.23341	0.767606	0.1756	0.1466
7GRX	B	403	c1cc(c(cc1F)F)N2C(=O)CCC2=O	XZT	0.877582	0.857055	0.0269955	0.36375	0.793875	0.794277	1	1.55	0.899088	0.366159	0.682851	0.215	0.189
7MYI	A	401	c1cc(sc1)C23CN(CC2CSC(=N3)N)c4ncccn4	ZQS	0.952688	0.960075	1.21217	1.9333	0.942289	0.982249	2	1.25	0.950242	1.9739	0.929719	0.173	0.147
5KQS	A	301	C[n+]1cn(c2c1C(=O)NC(=N2)N)C3C(C(C(O3)COP(=O)(O)OP(=O)(O)O)O)O	M7G	0.89843	0.919801	4.93431	4.78363	0.695686	0.609156	2	1.5	0.94579	5.30454	0.673772	0.169	0.144
5UCK	B	405	C(C(C=O)O)OP(=O)(O)O	G3H	0.898703	0.925401	0.733676	0.528623	0.498525	0.412982	2	1.782	0.909702	0.835197	0.56824	0.234	0.207
8EA7	A	302	Cn1c(ccn1)c2ccc(c(c2)C(=O)NC(c3cccc(c3)C(F)(F)F)C(=O)N(C)C)c4ccc(cc4)C(F)(F)F	VMH	0.832695	0.832695	13.9036	13.5357	0.538637	0.792466	1	1.28	0.885995	15.4666	0.464299	0.192	0.168
5FH3	A	704	c1nc2c(n1C3C(C(C(O3)COP(=O)(O)OP(=O)(O)OP(=O)(O)O)O)O)N=C(NC2=O)N	GTP	0.866215	0.877241	4.74771	4.40971	0.815363	0.844891	3	1.6	0.842739	4.93628	0.68615	0.259	0.236
4ZBL	A	65	c1ccc2c(c1)c(c[nH]2)C=C3C(=O)N(C(=N3)C(=N)CCC(=O)N)CC=O	4M9	0.846781	0.848288	1.70038	2.792	0.644389	0.500451	3	1.57	0.811226	2.76075	0.623843	0.1673	0.1472
1N55	A	650	C(C(=O)O)OP(=O)(O)O	PGA	0.944018	0.961842	0.41973	0.453268	0.724754	0.430896	3	0.83	0.94138	0.586036	0.46468	0.172	0.159
5EP7	A	1201	CN1C=C(C=CC1=O)C(=O)Nc2cccc(c2)C(=O)O	5QR	0.841015	0.841015	3.41787	3.19695	0.796445	0.837184	1	1.198	0.913778	4.39184	0.775186	0.166	0.144
8AVA	A	711	c1ccc(cc1)Cc2ccc(cc2)c3coc(n3)N	OVO	0.81823	0.81823	0.363744	0.363049	0.804181	0.993263	2	1.354	0.953882	0.355184	0.784886	0.176	0.145
5JS3	E	411	CC(C)CC(C(=O)NCC(C)C(C)(C)C)NP(=O)(CNC(=O)OCc1ccccc1)O	6MG	0.888733	0.896841	11.0149	11.0458	0.743091	0.613317	3	1.16	0.503201	14.0202	0.470769	0.145	0.129
1Z4M	A	1001	C1=CN(C(=O)NC1=O)C2C(C(C(O2)COP(=O)(O)O)O)O	U5P	0.768138	0.806429	1.92973	1.93733	0.639277	0.734271	3	1.7	0.819088	2.04868	0.595449	0.191	0.17
5DOG	A	304	c1ccc(cc1)CCSc2c(c(c(c(c2F)F)S(=O)(=O)N)NCc3ccccc3)F	5DT	0.81899	0.81899	4.65364	4.64488	0.276463	0.463223	1	1.7	0.5684	4.55381	0.22492	0.195	0.155
5NXI	A	302	c1cc(ccc1NS(=O)(=O)c2ccc(cc2)Br)S(=O)(=O)N	9DE	0.934354	0.934354	2.68043	2.70351	0.406234	0.667077	1	1.16	0.797985	3.41363	0.364888	0.155	0.144
5F6R	A	201	c1ccc(cc1)C(=O)CCCCC(=O)O	5VO	0.880827	0.880827	0.969439	0.324529	0.524843	0.75289	1	1.179	0.88611	0.604906	0.648526	0.161	0.145
6EOG	A	1001	c1cc(cc(c1)Cl)SC2C(C(C(C(O2)CO)O)n3cc(nn3)c4cc(c(c(c4)F)F)F)O	BKK	0.870228	0.868825	5.24856	4.65881	0.73421	0.567794	2	1.2	0.921067	5.26121	0.466076	0.174	0.154
5LNZ	A	301	CCCCN(C)C(=O)c1c2cc(c(cc2n[nH]1)O)C(=O)N(C)c3ccc(cc3)N4CCOCC4	70Z	0.866838	0.866838	6.52863	6.82413	0.741892	0.923066	1	1.54	0.950695	7.62259	0.700601	0.176	0.151
7Y2S	A	303	c1cc(cc(c1)[N+](=O)[O-])CC(=O)O	MNP	0.893519	0.893519	1.13806	1.13384	0.296467	0.631533	1	1.2	0.802903	1.09223	0.265162	0.161	0.144
5F6R	B	201	c1ccc(cc1)C(=O)CCCCC(=O)O	5VO	0.880827	0.880827	0.969439	0.324529	0.524843	0.75289	1	1.179	0.88611	0.604906	0.648526	0.161	0.145
6AUA	A	704	Cc1c(cccc1NC(=O)c2ccc(cc2)N3CCCCC3)C4C=NC(=O)C(=N4)Nc5ccc(c(c5)N)C(=O)N6CCOCC6	BXJ	0.888655	0.879684	9.44452	8.99584	0.74226	0.588389	3	1.66	0.823626	13.7292	0.668832	0.182	0.158
7Y2U	A	303	c1cc(cc(c1)[N+](=O)[O-])CC(=O)O	MNP	0.890955	0.890955	1.1393	1.13208	0.185588	0.437549	1	1.2	0.773954	1.13438	0.204117	0.158	0.14
1EQM	A	171	c1nc(c2c(n1)n(cn2)C3C(C(C(O3)COP(=O)(O)OP(=O)(O)O)O)O)N	ADP	0.870535	0.885574	2.70502	2.87037	0.703416	0.63736	2	1.5	0.744253	3.56631	0.361767	0.217	0.1856
6F4B	B	301	C(CC(=O)NC(CS)C(=O)NCC(=O)O)C(C(=O)O)N	GSH	0.951761	0.951761	8.96454	8.85586	0.947222	0.989503	1	1.55	0.91679	12.5941	0.785015	0.17	0.142
5NON	C	501	COc1ccc(cc1)CCNCCc2ccc(c(c2)O)O	93H	0.272642	0.424151	3.15099	2.3438	0.0696485	0.0724002	3	1.85	0.1329	1.74902	0.0640613	0.228	0.204
7YY1	B	202	c1nc(c2c(n1)n(cn2)C3C(C(C(O3)COP(=O)(CP(=O)(O)OP(=O)(O)O)O)O)O)N	APC	0.855386	0.893606	3.63378	3.41661	0.354748	0.31912	2	1.697	0.8798	3.82472	0.305616	0.228	0.205
8AKJ	A	305	C=C1CSC(N=C1C(=O)O)C(C=O)NC(=O)Cc2cccs2	CEO	0.907483	0.907483	8.7005	8.6148	0.825116	0.789181	1	1.35	0.91109	8.58797	0.877142	0.183	0.153
5MSA	A	302	CCCSc1c(c(c(c(c1F)F)S(=O)(=O)N)F)F	3TV	0.914112	0.938387	3.63625	3.27188	0.557584	0.465126	3	1.2	0.856837	3.6403	0.372841	0.179	0.156
5NT0	B	1204	c1ccc2c(c1)C(=O)NC(=N2)c3cccc(c3)N	97H	0.884099	0.887933	0.781834	0.74032	0.782577	0.887658	2	1.75	0.956517	0.677759	0.615291	0.194	0.165
8DT1	C	301	c1cc(c[n+](c1)C2C(C(C(O2)COP(=O)([O-])OP(=O)(O)OCC3C(C(C(O3)n4cnc5c4ncnc5N)O)O)O)O)C(=O)N	NAD	0.878619	0.878619	9.11479	8.87101	0.87675	0.962795	1	1.8	0.916171	9.45224	0.669103	0.185	0.159
5K0G	B	302	Cc1c(cn(n1)C)c2cc(n[nH]2)C(C)c3ccc(cc3)OC	6PM	0.897958	0.897958	6.37984	6.24118	0.542873	0.869595	1	1.89	0.919482	6.93748	0.560144	0.201	0.18
1O2X	A	246	c1cc2c(cc1C(=[NH2+])N)nc([nH]2)c3cc(cc(c3[O-])Br)C(CC(=O)[O-])C(=O)[O-]	847	0.95041	0.95041	4.89474	6.349	0.180244	0.180244	2	1.46	0.914545	6.12269	0.285097	0.1606	0.1439
5SD4	A	202	CCc1c(c(nc(n1)N)N)OCCCOc2c(cccn2)C#CCO	HVR	0.936955	0.936955	2.45025	2.79264	0.725157	0.891097	1	1.25	0.858495	3.15626	0.527626	0.16	0.132
5C40	A	401	c1nc(c2c(n1)n(cn2)C3C(C(C(O3)COP(=O)(O)OP(=O)(CP(=O)(O)O)O)O)O)N	ACP	0.933719	0.944649	3.63558	3.35681	0.475278	0.706884	2	1.5	0.940708	3.89624	0.526397	0.181	0.146
6DQE	A	601	c1ccc(cc1)c2c(cnn2c3cc(ccn3)C(=O)O)C(c4ccccc4)OCCN5CCCCC5	H6A	0.933727	0.933727	9.66067	9.77642	0.314643	0.686244	2	1.689	0.876508	9.24365	0.267345	0.185	0.172
6CYQ	B	301	CON=C(c1csc(n1)N)C(=O)NC(C2N=C(C(=C)CS2)C(=O)O)C(=O)O	CE4	0.854417	0.860313	21.9337	16.6081	0.653769	0.56445	1	1.698	0.86166	20.9481	0.554586	0.204	0.177
4QSJ	B	302	CC1=CC(=O)NC(=N1)SCC(=O)c2ccc(c(c2)Cl)S(=O)(=O)N	EWW	0.885019	0.90823	3.95786	3.93978	0.408114	0.480547	2	1.7	0.497858	4.18219	0.24853	0.196	0.167
4QJ0	D	305	c1ccc(cc1)[C@H]([C@H](c2ccccc2)O)Nc3c(c(c(c(c3S(=O)(=O)CCO)F)F)S(=O)(=O)N)F	WWX	0.943843	0.943843	14.1891	14.1958	0.707576	0.864495	1	1.55	0.771881	14.1101	0.609569	0.212	0.18
4PQN	A	701	CC1(CCc2c([nH]nc2C(=O)Nc3cnn(c3)[C@@H](CCN(C)C)c4ccccc4)C1)C	2W6	0.87805	0.87805	5.55092	4.19829	0.819004	0.882384	1	1.71	0.929689	5.5722	0.820533	0.209	0.173
4MKT	A	703	c1ccc(cc1)Cc2ccc(cc2)c3csc(n3)N	1V6	0.733439	0.741348	0.340679	0.355619	0.204123	0.202644	1	1.618	0.804067	0.325601	0.150322	0.1759	0.1611
4MS6	A	702	C1C[C@H](NC1)C(=O)CCC(=O)N2CCC[C@H]2C(=O)O	28T	0.74255	0.774385	5.3177	5.41294	0.634467	0.778267	2	1.72	0.50968	7.75683	0.510042	0.211	0.182
4IWF	A	601	c1cc(c(cc1c2ccc(c(c2Cl)/C=N/O)O)F)O	15Q	0.786286	0.820616	3.36309	3.16198	0.262783	0.588292	2	1.932	0.79449	0.873997	0.45132	0.22	0.196
4G95	A	201	c1cc(c(cc1Cl)NCc2cc3c(nc(nc3nc2)N)N)Cl	OAG	0.794025	0.859242	0.30958	0.922065	0.417488	0.548628	3	1.35	0.74772	1.20602	0.582782	0.166	0.145
4FOD	A	1501	CC(C)NC(=O)C1CCC(CC1)N\2c3cc(ccc3N/C2=N\C(=O)c4ccc(cc4)F)CN5CCC(CC5)C(C)(C)O	0UV	0.836448	0.882865	9.43103	9.34313	0.250867	0.658379	2	2	0.900781	13.532	0.238562	0.211	0.175
3W7R	A	408	c1ccc(cc1)c2ccc(cc2)CCC3=C(NC(=O)NC3=O)C(=O)O	W7A	0.853911	0.87027	2.21069	2.15071	0.802004	0.806955	3	1.68	0.872992	2.60994	0.709416	0.1775	0.1635
3W7J	B	401	c1cc2cc(ccc2cc1CCC3=C(NC(=O)NC3=O)C(=O)O)C(=O)O	W7J	0.932486	0.932486	3.65822	3.64549	0.562111	0.735723	1	1.58	0.842351	3.59809	0.562143	0.186	0.154
3T5F	H	1	CC(C)C[C@H](C(=O)N1CCC[C@H]1C(=O)NCc2cc(ccc2CN)Cl)NS(=O)(=O)Cc3ccccc3	M34	0.888855	0.895264	10.3627	10.2479	0.329301	0.687009	2	1.45	0.894965	11.3165	0.454471	0.169	0.14
3S8X	A	266	CC1=CC(=O)NC(=N1)SCC(=O)c2ccc(cc2)S(=O)(=O)N	E59	0.932456	0.949602	4.37807	2.68842	0.655189	0.678584	2	1.3	0.848962	4.42627	0.394532	0.168	0.139
3SI4	H	1	C[n+]1ccccc1CNC(=O)[C@@H]2CCCN2C(=O)[C@@H](Cc3ccccc3)N	B04	0.890257	0.890257	5.77052	5.68515	0.715118	0.755633	1	1.27	0.908613	7.70823	0.557854	0.163	0.145
3S7A	A	192	c1ccc2c(c1)C=Cc3cc(ccc3N2Cc4cnc5c(n4)c(nc(n5)N)N)OCCCC(=O)O	684	0.846357	0.864588	2.52283	2.56065	0.793901	0.839156	3	1.8	0.904382	2.39133	0.547446	0.247	0.206
3P4V	A	300	COC(=O)/C=C/C(=O)N[C@@H](Cc1ccc(c(c1)Cl)O)C(=O)O	PMX	0.77259	0.788502	7.55638	7.3281	0.505124	0.766401	2	2	0.881292	10.1024	0.564465	0.187	0.152
3OIK	A	300	CCc1cc2c(cc1OS(=O)(=O)N)CC[C@@H]3[C@@H]2CC[C@]4([C@H]3CC[C@@H]4OS(=O)(=O)N)C	WZB	0.941266	0.941266	6.07791	5.97896	0.759271	0.86897	1	1.5	0.734022	6.0572	0.614268	0.166	0.133
3NM0	A	800	C[C@H]1C[C@H](N=C(C1)N)C[C@@H]2CNC[C@@H]2OCCNCC(c3ccccc3)(F)F	3XE	0.664115	0.708249	5.33939	5.37854	0.278944	0.521697	2	1.81	0.771108	5.15566	0.248452	0.217	0.19
3O57	A	506	CCn1c2c(cn1)c(c(cn2)c3nc(c(o3)Cc4ccccc4)CC(=O)N5CCCC5)NC6CCOCC6	ZG2	0.691013	0.732547	5.50913	5.50343	0.362998	0.557104	2	2	0.736952	7.05879	0.253217	0.235	0.203
3NLZ	A	800	Cc1cc(nc(c1)N)C[C@@H]2CNC[C@@H]2OCCNCC(c3ccccc3)(F)F	3XD	0.801848	0.841181	5.17433	5.23336	0.489741	0.841798	2	1.92	0.838914	5.2762	0.401452	0.219	0.182
3NLX	A	800	Cc1cc(nc(c1)N)C[C@@H]2CNC[C@@H]2OCCNCC(c3cccc(c3)F)(F)F	3XB	0.825354	0.867847	5.17192	5.31292	0.683807	0.879788	2	1.87	0.817641	5.3638	0.232054	0.221	0.19
3LFF	A	362	CC(C)(C)c1cc(n(n1)c2ccc(cc2)CC(=O)O)NC(=O)Nc3nccs3	Z83	0.9092	0.923753	3.21882	3.04225	0.867643	0.969066	2	1.5	0.94853	5.61529	0.775588	0.184	0.154
3JT8	A	800	CC(C)SCCC(=N)NCCCC(C(=O)O)N	JM4	0.694926	0.771617	5.01907	5.19059	0.120167	0.306187	2	1.95	0.440572	6.68263	0.147681	0.233	0.206
3ELJ	A	365	COc1cc(ccc1Nc2nc3c(cc[nH]3)c(n2)Nc4cccc(c4C(=O)N)F)CS(=O)(=O)C	GS7	0.898571	0.898571	7.53015	8.85571	0.760687	0.923695	1	1.8	0.902859	7.51316	0.737071	0.203	0.178
2YOH	B	211	CC1=CN(C(=O)NC1=O)[C@@H]2C[C@@H]([C@H](O2)CNC(=O)Nc3ccc(cc3)[N+](=O)[O-])O	WMJ	0.912115	0.924036	2.98774	3.41841	0.217366	0.548142	3	1.6	0.851883	7.84393	0.394362	0.1982	0.1756
1FD0	A	450	CC1(CCC(c2c1ccc(c2)/C(=N/O)/c3ccc4cc(ccc4c3)C(=O)O)(C)C)C	254	0.886905	0.873996	6.2484	6.10897	0.922517	0.825847	3	1.38	0.951798	6.11717	0.829805	0.169	0.152
1H1R	A	1298	c1cc(cc(c1)Cl)Nc2nc3c(c(n2)OCC4CCCCC4)[nH]cn3	6CP	0.859278	0.903938	5.12683	3.19377	0.572102	0.87985	2	2	0.925083	6.01069	0.721605	0.243	0.214
1Q2O	A	790	C(C[C@@H](C(=O)N[C@@H](CCN)C(=O)N)N)CNC(=N)N[N+](=O)[O-]	DP1	0.851767	0.851767	9.46128	9.28207	0.243944	0.579301	1	1.74	0.719488	16.1247	0.224467	0.196	0.165
1T41	A	320	c1cc(c(cc1F)OCC(=O)O)C(=O)NCc2nc3c(c(cc(c3s2)F)F)F	ID5	0.947479	0.947479	3.68592	3.89229	0.904101	0.929547	1	1.05	0.960008	3.13129	0.658954	0.146	0.138
1TBB	A	501	COc1ccc(cc1OC2CCCC2)[C@H]3CC(=O)NC3	ROL	0.868715	0.921557	10.2876	9.63012	0.635895	0.773489	3	1.6	0.92761	10.1933	0.710892	0.201	0.171
1ZSK	A	301	[H]N=C(c1ccc2cc(cc(c2c1)NC(=O)c3cccc(c3C)O)C(=O)OC)N	421	0.913383	0.913383	11.4935	8.29262	0.823345	0.983868	1	1.9	0.928104	9.60733	0.799377	0.197	0.16
1ZZQ	A	799	C1[C@H](CN[C@@H]1C(=O)N)NC(=O)[C@H](CCCNC(=N)N[N+](=O)[O-])N	DP9	0.775888	0.824027	18.5498	10.5535	0.193784	0.537512	2	1.9	0.676429	18.6787	0.159354	0.215	0.192
2F71	A	608	CNC(=O)[C@@H]1Cc2ccc(cc2CN1C(=O)CCc3cccc(c3)C(=O)O)NS(=O)(=O)O	UN7	0.854696	0.869929	6.4592	6.26053	0.692908	0.782999	3	1.55	0.777334	7.97708	0.318786	0.192	0.18
2G8J	A	400	CC(C)C[C@@H](C(=O)N[C@@H](Cc1ccccc1)C(=O)C(=O)NC2CC2)NC(=O)OCCOCCOC	D7G	0.871409	0.871409	22.5224	22.4431	0.343783	0.397601	1	1.61	0.85534	27.5879	0.276004	0.198	0.172
2JJK	A	1336	c1cc(cc(c1)Cl)S(=O)(=O)NC(=O)NCCCCCCCNC(=O)NS(=O)(=O)c2cccc(c2)Cl	R15	0.899372	0.910039	3.83281	3.21535	0.388901	0.412027	2	2	0.734368	10.5026	0.278711	0.243	0.205
2R3I	A	501	c1ccc(c(c1)c2cc(n3c(n2)ccn3)NCc4ccncc4)F	SCF	0.823542	0.823542	1.85132	1.89819	0.946597	0.855433	1	1.28	0.920098	1.79524	0.907613	0.174	0.15
2R3P	A	501	c1cc(c(c(c1)Cl)Cl)c2cc(n3c(n2)c(cn3)SC#N)NCc4ccncc4	3SC	0.768721	0.816316	2.34377	2.00363	0.713336	0.672807	2	1.66	0.856994	2.29204	0.747567	0.213	0.175
2VIP	A	1247	CC(C)Oc1cccc(c1)NC(=O)c2cc(c(c(c2)Cl)OCCN)Cl	L1R	0.872012	0.901111	8.85151	8.67847	0.40228	0.519968	2	1.72	0.889556	10.4833	0.307194	0.213	0.175
2VWX	A	1889	c1cc(cc(c1)S(=O)(=O)N)Nc2nccc(n2)Nc3c(ccc4c3OCO4)Cl	7X4	0.890958	0.901242	3.99632	5.69933	0.8842	0.768269	2	1.65	0.941229	5.61626	0.713392	0.211	0.178
2VX1	A	1889	c1cc(cc(c1)Nc2nccc(n2)Nc3c(ccc4c3OCO4)Cl)C(=O)N	7X8	0.914901	0.936979	4.54646	4.83719	0.858046	0.801688	2	1.65	0.952426	4.53798	0.712887	0.212	0.177
2W9H	A	1160	COc1cc(cc(c1OC)OC)Cc2cnc(nc2N)N	TOP	0.852689	0.852689	6.83079	6.98208	0.704313	0.570622	1	1.48	0.89698	6.25551	0.780587	0.189	0.154
2X9F	A	1889	CS(=O)(=O)c1cccc(c1)Nc2nccc(n2)Nc3cccc4c3cn[nH]4	X9F	0.937531	0.945848	6.25241	5.10692	0.89717	1.00033	2	1.75	0.929775	6.07365	0.847745	0.197	0.167
5KAO	A	500	CC(C)CN(CC(C(Cc1ccc(c(c1)Cl)OC)NC(=O)OC2COC3C2CCO3)O)S(=O)(=O)c4ccc(cc4)OC	G43	0.85119	0.849768	15.4466	14.2825	0.789841	0.624381	2	1.8	0.775935	18.6855	0.562589	0.216	0.19
5MNP	A	305	C1CCN(CC1)C(=N)N	MRZ	0.930195	0.94198	0.067693	0.357406	0.845527	0.790272	2	1.01	0.94935	1.04957	0.78047	0.1582	0.1501
5JG3	B	302	c1ccc2c(c1)nc(s2)S(=O)(=O)N	EVF	0.932073	0.940047	2.11844	2.28243	0.847747	0.911696	3	1.21	0.941559	0.96443	0.790378	0.171	0.148
5JSS	E	406	CC(C)CC(C(=O)NCC(C)C(C)(C)C)NP(=O)(CNC(=O)OCc1ccccc1)O	6NG	0.867975	0.876043	9.91585	10.697	0.768472	0.618146	3	1.19	0.685332	13.8985	0.720502	0.145	0.131
4YQ9	A	301	c1cc(ncc1C(=O)N)NC2CCCC2	4GO	0.893879	0.899874	4.81061	7.35737	0.88682	0.95239	3	1.64	0.950654	5.01966	0.758279	0.195	0.173
4YTQ	A	402	CC(=O)C(C(C(CO)O)O)O	TGD	0.654048	0.712405	7.72786	7.77734	0.271131	0.579718	3	1.9	0.362706	7.69601	0.345963	0.189	0.155
4YWR	A	300	Cc1c(c(c(cn1)COP(=O)(O)O)C=O)O	PLP	0.853837	0.876456	0.697862	0.60066	0.727232	0.744008	2	1.65	0.874555	0.661392	0.615144	0.184	0.162
5S7Y	A	501	Cc1c(cncc1c2cc(c(c(c2)OC)OC)OC)c3ccc(cc3)C4CCN(CC4)C	LU8	0.917502	0.930504	8.1451	8.19805	0.271253	0.286065	3	1.37	0.95035	8.58438	0.319366	0.183	0.153
5CBU	A	205	CCOC(=O)CNC(=O)NCc1cccc(c1)c2ccncc2	4ZM	0.808618	0.808618	2.25424	2.25093	0.358007	0.592759	3	1.4	0.419089	7.40409	0.208067	0.175	0.148
5UL4	A	803	C[S+](CCC(C(=O)[O-])N)CC1C(C(C(O1)n2cnc3c2ncnc3N)O)O	SAM	0.510502	0.597076	3.23155	4.19372	0.178634	0.220388	3	1.85	0.60169	4.28144	0.179275	0.234	0.208
5C41	A	401	c1nc(c2c(n1)n(cn2)C3C(C(C(O3)COP(=O)(O)OP(=O)(CP(=O)(O)O)O)O)O)N	ACP	0.877667	0.91638	3.41869	3.12218	0.795049	0.88454	3	1.95	0.909227	3.70345	0.645205	0.213	0.181
5A92	A	1295	CON=C(c1csc(n1)N)C(=O)NC(C=O)C2N=C(C(=C)CS2)C(=O)O	CEF	0.830724	0.848236	18.3836	14.1781	0.481524	0.280578	3	1.05	0.793541	20.8347	0.416149	0.171	0.157
5B2X	A	502	c1ccc2c(c1)c(c[nH]2)CC(C(=O)O)NC(=O)C(C(C(C(C(C(F)(F)F)(F)F)(F)F)(F)F)(F)F)(F)F	W0T	0.598097	0.598097	14.1404	13.9723	0.24269	0.391586	1	1.9				0.198	0.166
5DPE	E	401	CC(C)CC(C(=O)NC(C(=O)O)C(C)(C)C)NP(=O)(CNC(=O)OCc1ccccc1)O	5H8	0.727785	0.78218	15.1661	15.2483	0.662785	0.595389	3	1.34	0.494844	18.3938	0.656085	0.167	0.147
5DPX	A	403	Cc1ccccc1C2=NC(=S)N=N2	L3B	0.843575	0.835857	2.59014	2.58516	0.405626	0.783473	2	1.85	0.46026	2.17603	0.420759	0.197	0.163
5MAE	A	301	c1cnc(cn1)CN(c2nc(nc(n2)N3CCOCC3)C=[N-])C4CCCC4	7KN	0.826338	0.871854	6.61384	7.85474	0.770262	0.659865	3	1	0.858055	6.80147	0.611922	0.185	0.161
5MSB	B	305	C(CS(=O)(=O)c1c(c(c(c(c1F)F)S(=O)(=O)N)F)F)O	V13	0.92463	0.931912	4.25883	3.81921	0.263458	0.378318	2	1.3	0.533076	4.23364	0.324363	0.193	0.16
5S7N	A	501	Cc1c(cncc1c2cc(c(c(c2)OC)OC)OC)c3ccc(cc3)C4CCN(CC4)C	LU8	0.918797	0.939692	7.91971	7.56555	0.286813	0.313686	3	1.3	0.94591	9.34287	0.286669	0.185	0.156
5L9Q	A	201	c1nc(c2c(n1)n(cn2)C3C(C(C(O3)COP(=O)(O)OP(=O)(O)O)O)O)N	ADP	0.785754	0.856225	3.93833	4.02973	0.706954	0.814776	3	1.75	0.853071	3.49371	0.611876	0.256	0.226
5LZI	A	202	CC(=O)NC1C(CC(OC1C(C(CO)O)O)(C(=O)O)n2cc(nn2)CC(C(=O)NCCC3C(C(C(C(O3)CO)O)O)O)NC(=O)Cc4ccccc4)O	7BQ	0.92581	0.92581	16.6202	16.5958	0.511551	0.800982	2	1.6	0.677411	20.724	0.368273	0.18	0.15
5MP8	A	406	C[NH2+]Cc1ccc(c(c1)Cl)c2ccccc2	RKN	0.852905	0.888392	0.399754	0.385745	0.497326	0.707618	2	1.92	0.87806	0.560615	0.47009	0.242	0.216
5MMF	A	401	CCC[NH2+]Cc1ccc(c(c1)Cl)c2ccccc2	JMB	0.798679	0.832403	0.378081	0.319908	0.225452	0.314733	2	1.99	0.858119	0.280037	0.265171	0.239	0.213
5LL5	D	302	c1ccc2c(c1)ncn2CC(=O)c3ccc(cc3)S(=O)(=O)N	6YH	0.935454	0.950188	3.12057	2.41349	0.292827	0.40429	2	1.42	0.678629	2.50106	0.289518	0.171	0.14
5LLN	B	304	CCCSc1c(c(c(c(c1F)F)S(=O)(=O)N)F)F	3TV	0.824026	0.866777	3.701	2.89027	0.381912	0.53063	2	1.6	0.60332	2.6934	0.328722	0.193	0.163
5MG2	A	1704	Cc1cc2c(cc1N3C(=O)c4cccc5c4c(ccc5CCCO)C3=O)N(C(=O)N2C)C	7M8	0.901569	0.901569	0.0497956	0.0466452	0.6564	0.854258	3	1.75	0.659018	0.071612	0.603208	0.224	0.206
5IVJ	A	601	c1cc2c(cc1F)c(nn2CCN3CCC(CC3)(F)F)Nc4cnccc4C(=O)O	6ED	0.898127	0.920424	2.90573	2.85055	0.265667	0.475347	2	1.569	0.913608	2.57523	0.168893	0.199	0.171
5OBK	A	201	c1ccnc(c1)CN2CC(C3CCCC(C2=O)N3S(=O)(=O)c4cc(cc(c4)Cl)Cl)CO	9QN	0.915473	0.92597	2.56027	2.53502	0.974289	0.980203	2	1	0.970207	2.56472	0.973005	0.162	0.146
5WGI	A	802	CC(C=C(C)C=CC(=O)NO)C(=O)c1ccc(cc1)N(C)C	TSN	0.80362	0.80362	3.32059	3.13004	0.755085	0.863263	2	1.05	0.613937	6.21323	0.53853	0.153	0.136
5S83	A	501	Cc1c(cncc1c2cc(c(c(c2)OC)OC)OC)c3ccc(cc3)C4CCN(CC4)C	LU8	0.90641	0.923227	8.12579	7.69597	0.823987	0.648118	2	1.33	0.951329	8.38112	0.319485	0.187	0.159
5NXP	A	302	CN(CC(=O)Nc1ccc(cc1)S(=O)(=O)N)c2ccccc2	9DH	0.918254	0.922557	4.48702	4.24651	0.654577	0.612629	3	1.25	0.86522	4.60772	0.604811	0.172	0.144
5NXE	A	1204	CN(CCO)c1ccc(cc1)C2Nc3ccccc3C(=O)N2	9D5	0.868909	0.908821	1.08971	1.47571	0.272535	0.627685	2	1.6	0.941801	1.69502	0.436742	0.195	0.168
5O9P	A	601	c1ccnc(c1)COCc2cn(nn2)C3C(C(C(C(O3)CO)O)OC4C(C(C(C(O4)CO)O)OC5C(C(C(C(O5)CO)O)O)O)O)O	9P8	0.879373	0.879373	16.5451	16.5571	0.99652	1.0302	1	1.75	0.846908	16.4471	0.737988	0.228	0.206
5NUT	A	1204	CC(C)Oc1ccc(cc1)C2=Nc3ccccc3C(=O)N2	9A8	0.894096	0.92071	5.26073	5.49283	0.280127	0.537877	1	1.6	0.965125	5.02655	0.295938	0.191	0.165
5O3R	C	200	c1nc(c2c(n1)n(cn2)C3C(C(C(O3)COP(=O)(O)O)O)O)N	AMP	0.700919	0.766215	2.29828	1.92703	0.175578	0.384302	2	1.9	0.727288	2.58267	0.250911	0.205	0.194
