# Supplementary material for: Expanding automated multiconformer ligand modeling to macrocycles and fragments
Source: eLife. 2025 Jun 30;14:RP103797. doi: 10.7554/eLife.103797 (PMC12208665; doi:10.7554/eLife.103797)
Supplement: Supplementary file 2. [file elife-103797-supp2.xlsx]

## Sheet: Sheet1
PDB	Chain	Residue Number	Ligand Name	SMILES	Deposited RSCC	qFit-ligand RSCC	Deposited Strain	qFit-ligand Strain	Deposited EDIAm	qFit-ligand EDIAm	Number of qFit-ligand Conformers
1NQC	A	218	C4P	c1ccc(cc1)CC(C(=O)NC(CSCc2ccccc2)C=O)NC(=O)N3CCOCC3	0.83159	0.846644	10.0411	10.1117	0.512539	0.860427	2
2JFG	A	1440	UMA	CC(C(=O)O)NC(=O)C(C)OC1C(C(OC(C1O)CO)OP(=O)(O)OP(=O)(O)OCC2C(C(C(O2)N3C=CC(=O)NC3=O)O)O)NC(=O)C	0.803597	0.825389	28.1565	28.2274	0.829151	0.99093	2
8HVL	A	401	4WI	CC1(C2C1C(N(C2)C(=O)C(C(C)(C)C)NC(=O)C(F)(F)F)C(=O)NC(CC3CCNC3=O)C=N)C	0.805969	0.805969	13.6324	14.3254	0.725351	0.901192	1
7K6A	A	201	NAP	c1cc(c[n+](c1)C2C(C(C(O2)COP(=O)([O-])OP(=O)(O)OCC3C(C(C(O3)n4cnc5c4ncnc5N)OP(=O)(O)O)O)O)O)C(=O)N	0.880178	0.880178	11.7483	11.9951	0.990749	1.03496	1
8TPH	A	500	JKL	CC(CC(=O)N(c1ccc(cc1)C(C)(C)C)C(c2cccnc2)C(=O)NC3CCCCC3)O	0.843066	0.843066	11.4102	11.6326	0.658836	0.842729	1
6BFE	A	401	DJV	CC(=O)NC(Cc1cc(cc(c1)F)F)C(C2CC(CN2)OCC3CCCCC3)O	0.915112	0.915112	12.548	12.7218	0.941463	0.979379	1
6A1W	A	402	9P3	Cc1cc2c(cc1C)[N+]3(C4(O3)C(=O)NC(=O)N=C4N2CC(C(C(COP(=O)(O)O)O)O)O)C(=O)C	0.858773	0.880266	13.3654	5.95174	0.765898	0.659492	1
7LLB	A	301	8YL	CC1C(NC(=C1SC2CC(NC2)C(=O)N(C)C)C(=O)O)C(C(C)O)C(=O)O	0.851387	0.851387	21.2797	18.0153	0.174957	0.27937	1
1Q36	A	600	SKP	CC(C(=O)O)(OC1CC(=CC(C1O)OP(=O)(O)O)C(=O)O)OP(=O)(O)O	0.959473	0.959473	16.5914	16.6424	0.906256	0.986353	1
7R61	A	701	2IJ	c1ccc(cc1)Oc2ccc(cc2)Oc3c(cc(cn3)C4CCCN(C4)C=N)C(=O)N	0.895046	0.895046	13.1184	13.4082	0.855984	0.947495	1
2UUH	A	1150	GSH	C(CC(=O)NC(CS)C(=O)NCC(=O)O)C(C(=O)O)N	0.909558	0.909558	10.6654	8.97513	0.91947	1.01725	1
6DDP	A	201	NDP	c1nc(c2c(n1)n(cn2)C3C(C(C(O3)COP(=O)(O)OP(=O)(O)OCC4C(C(C(O4)N5C=CCC(=C5)C(=O)N)O)O)O)OP(=O)(O)O)N	0.8642	0.8642	12.2428	12.0035	0.925511	0.822138	1
2PQB	A	501	GG9	C1C(C(C(C=C1C(=O)O)OP(=O)(O)O)O)OC(C(F)F)(C(=O)O)OP(=O)(O)O	0.919938	0.919938	15.419	15.3347	0.895026	0.968381	1
6CI5	A	302	F5G	CC1C(C(C(C(O1)OP(=O)(O)OP(=O)(O)OCC2C(C(C(O2)N3C=CC(=O)NC3=O)O)O)NC(=O)C)O)NC=O	0.830145	0.830145	14.9063	14.6856	0.472485	0.665438	1
7QKD	A	301	ALD	CC(C)CC(CO)NC(=O)C(CC(C)C)NC(=O)C(CC(C)C)NC(=O)OCc1ccccc1	0.729179	0.729179	16.7722	17.7962			1
7FQI	A	501	WSN	c1cc(ccc1C2(CC2)C(=O)N3CCCC3C(=O)NC(CC(=O)N)C=N)OCc4ccc(cc4F)F	0.851325	0.851325	10.5197	10.5197			1
7NG3	A	402	ALD	CC(C)CC(CO)NC(=O)C(CC(C)C)NC(=O)C(CC(C)C)NC(=O)OCc1ccccc1	0.881686	0.881686	18.9496	18.5641	0.840564	0.934692	1
2PDX	A	500	NAP	c1cc(c[n+](c1)C2C(C(C(O2)COP(=O)([O-])OP(=O)(O)OCC3C(C(C(O3)n4cnc5c4ncnc5N)OP(=O)(O)O)O)O)O)C(=O)N	0.954162	0.954162	14.2103	13.8676	0.996813	1.04601	1
2C27	A	1313	ACO	CC(=O)SCCNC(=O)CCNC(=O)C(C(C)(C)COP(=O)(O)OP(=O)(O)OCC1C(C(C(O1)n2cnc3c2ncnc3N)O)OP(=O)(O)O)O	0.876831	0.889564	13.8465	12.9977	0.936232	0.992759	2
5Z8A	A	502	JIA	CC1(COC(C(C1NC)O)OC2C(CC(C(C2O)OC3C(C(C(C(O3)CN)O)O)N)N)N)O	0.885362	0.885362	18.1343	18.6328	0.262032	0.542388	1
1PW8	A	400	H2A	CC(=O)OCC1CSC2C(C(=O)N2C1C(=O)[O-])NC(=O)CCCCC(C(=O)[O-])NC(=O)C[NH3+]	0.927822	0.927822	14.9244	12.3612	0.753442	0.914955	1
1M4I	A	600	COA	CC(C)(COP(=O)(O)OP(=O)(O)OCC1C(C(C(O1)n2cnc3c2ncnc3N)O)OP(=O)(O)O)C(C(=O)NCCC(=O)NCCS)O	0.916094	0.916094	11.4821	11.6769	0.805532	0.763683	1
1QZ6	A	500	JAS	CC1CCC=Cc2nc(co2)-c3nc(co3)-c4nc(co4)C(C(C(=O)CC(CC(CC(=O)OC1CC(C(C)CCC(=O)C(C)C(CC=CN(C)CO)OC)OC)O)O)C)OC	0.892006	0.892006	18.4536	18.5313	0.934866	0.982552	1
2V3H	H	1246	I25	[H]N=C(c1ccc(cc1)NC(c2cc(cc(c2)OCC(C)(C)CN(C)C)CC)C(=O)O)N	0.823041	0.889024	10.688	12.5975	0.153646	0.269189	2
2RKV	A	452	COA	CC(C)(COP(=O)(O)OP(=O)(O)OCC1C(C(C(O1)n2cnc3c2ncnc3N)O)OP(=O)(O)O)C(C(=O)NCCC(=O)NCCS)O	0.911044	0.911044	11.1951	11.0925	0.880067	0.966735	1
2PJ7	A	401	235	CC(C)C(NS(=O)(=O)c1ccccc1)P(=O)(CC(c2cccc(c2)CN)C(=O)O)O	0.94141	0.94141	13.5487	13.2283	0.478527	0.692042	1
2W12	A	1204	WR2	CC(C)CC(C(CNC(=O)c1nccs1)C(=O)NO)C(=O)NC(C(=O)NC)C(C)(C)C	0.787383	0.806126	18.1398	15.5499	0.84796	0.82227	2
1QIP	A	1002	GNB	c1cc(ccc1COC(O)SCC(C(=O)NCC(=O)O)NC(=O)CCC(C(=O)O)N)[N+](=O)[O-]	0.814293	0.814293	17.9812	15.2766	0.245722	0.269244	1
7PT2	A	702	3KK	CC(C)(COP(=O)(O)OP(=O)(O)OCC1C(C(C(O1)n2cnc3c2ncnc3N)O)OP(=O)(O)O)C(C(=O)NCCC(=O)NCCSC(=O)C(C)(C)O)O	0.938593	0.938593	16.6745	13.866	0.856926	0.892573	1
8EWU	A	402	NDP	c1nc(c2c(n1)n(cn2)C3C(C(C(O3)COP(=O)(O)OP(=O)(O)OCC4C(C(C(O4)N5C=CCC(=C5)C(=O)N)O)O)O)OP(=O)(O)O)N	0.964477	0.964477	12.6801	12.3138	1.01516	1.02612	1
5Z6K	A	202	NAP	c1cc(c[n+](c1)C2C(C(C(O2)COP(=O)([O-])OP(=O)(O)OCC3C(C(C(O3)n4cnc5c4ncnc5N)OP(=O)(O)O)O)O)O)C(=O)N	0.877417	0.877417	12.7885	12.3031	0.897438	0.989037	1
4AL4	A	1333	W7E	Cc1nc2ccc(cc2s1)NC(=O)CCNC(=O)NCCOc3ccc(cc3)CC(C(=O)O)C(=O)O	0.911714	0.911714	10.3051	8.83567	0.878288	0.969937	1
6HPE	A	301	GVX	c1ccc(cc1)CCNC(=S)SCC(C(=O)NCC(=O)O)NC(=O)CCC(C(=O)O)N	0.892052	0.892052	11.7583	10.6636	0.89448	1.00411	1
2DUX	A	500	NAP	c1cc(c[n+](c1)C2C(C(C(O2)COP(=O)([O-])OP(=O)(O)OCC3C(C(C(O3)n4cnc5c4ncnc5N)OP(=O)(O)O)O)O)O)C(=O)N	0.856501	0.856501	13.9988	13.7066	0.955296	0.989809	1
2FZ9	A	500	NAP	c1cc(c[n+](c1)C2C(C(C(O2)COP(=O)([O-])OP(=O)(O)OCC3C(C(C(O3)n4cnc5c4ncnc5N)OP(=O)(O)O)O)O)O)C(=O)N	0.851214	0.851214	13.8836	13.6908	0.951555	0.981891	1
7LVC	A	202	NAP	c1cc(c[n+](c1)C2C(C(C(O2)COP(=O)([O-])OP(=O)(O)OCC3C(C(C(O3)n4cnc5c4ncnc5N)OP(=O)(O)O)O)O)O)C(=O)N	0.865224	0.865224	11.4276	11.4946	0.934511	1.01401	1
2R9F	A	367	K2Z	CCC(C(C(=O)NCCCN1CCN(CC1)C)O)NC(=O)C(CC(C)C)NC(=O)OCc2ccccc2	0.895682	0.914746	18.3507	16.9185	0.327221	0.513317	2
6WCO	A	403	X47	CC(C)(C)c1ccc(cc1)N(C(c2cccnc2)C(=O)NC3CCCC3)C(=O)c4c[nH]cn4	0.791829	0.791829	13.0955	12.2124	0.129101	0.548425	1
7LZX	A	402	YMD	CC(C)CC(C(=O)NC(CC1CCNC1=O)C(O)S(=O)(=O)O)NC(=O)OC2CCC(CC2)(C)C	0.686795	0.693734	12.436	16.2602	0.671212	0.832136	2
6BFX	A	401	DKJ	CC1C(OCC(N1)C(C(Cc2cc(cc(c2)F)F)NC(=O)C)O)OCC(C)(C)C	0.878774	0.886242	12.5485	12.6749	0.870693	0.99589	1
2VJ9	A	1452	VG7	CCNc1cc(cc(c1)N2CCCC2=O)C(=O)NC(Cc3ccccc3)C(CNC4CCCCC4)O	0.894617	0.894617	13.5672	13.3951	0.923751	0.950938	1
6CYV	A	201	NAP	c1cc(c[n+](c1)C2C(C(C(O2)COP(=O)([O-])OP(=O)(O)OCC3C(C(C(O3)n4cnc5c4ncnc5N)OP(=O)(O)O)O)O)O)C(=O)N	0.833838	0.840398	11.7212	12.2416	0.659411	0.758866	1
2YCF	A	600	YCF	CC(=NNC(=NO)N)c1ccc(cc1)NC(=O)Nc2ccc(cc2)C(=NNC(=N)NO)C	0.898855	0.908096	11.4532	10.0731	0.757554	0.67284	2
7KM8	A	201	NAP	c1cc(c[n+](c1)C2C(C(C(O2)COP(=O)([O-])OP(=O)(O)OCC3C(C(C(O3)n4cnc5c4ncnc5N)OP(=O)(O)O)O)O)O)C(=O)N	0.968114	0.968114	11.775	11.7716	1.05968	1.07213	1
1PWD	A	400	0MU	CC(=O)OCC1CSC(N=C1C(=O)O)C(C=O)NC(=O)CCCC(C(=O)O)N	0.89327	0.89327	11.701	11.3969	0.3312	0.732871	1
6MB1	A	501	YNC	CC(C)(COP(=O)(O)OP(=O)(O)OCC1C(C(C(O1)n2cnc3c2ncnc3N)O)OP(=O)(O)O)C(C(=O)NCCC(=O)NCCSC(=O)CCCCCCCCCCCC#C)O	0.903384	0.903384	13.4428	12.8707	0.936655	1.00438	1
6U2Y	A	300	MX1	COC(C1N=C(C(=C)CO1)C(=O)O)(C(=O)O)NC(=O)C(c2ccc(cc2)O)C(=O)O	0.805374	0.805374	17.0493	12.4209	0.634968	0.873317	1
2PJ9	A	401	281	CC(C)C(NS(=O)(=O)c1cccc2c1nsn2)P(=O)(CC(c3cccc(c3)CN)C(=O)O)O	0.948423	0.948423	12.0444	12.2203	0.880135	0.990718	1
1P3D	A	602	UMA	CC(C(=O)O)NC(=O)C(C)OC1C(C(OC(C1O)CO)OP(=O)(O)OP(=O)(O)OCC2C(C(C(O2)N3C=CC(=O)NC3=O)O)O)NC(=O)C	0.923919	0.923919	28.6308	28.3757	0.812523	0.964441	1
2PQC	A	601	RC1	CC(C(=O)O)(OC1CC(=CC(C1O)OP(=O)(O)O)C(=O)O)P(=O)(O)O	0.901374	0.901374	14.2056	14.3669	0.719597	0.875816	1
6LZE	A	405	FHR	c1ccc2c(c1)cc([nH]2)C(=O)NC(CC3CCCCC3)C(=O)NC(CC4CCNC4=O)C=O	0.839757	0.839757	11.0815	11.1748	0.85253	0.958915	1
2UAG	A	450	UMA	CC(C(=O)O)NC(=O)C(C)OC1C(C(OC(C1O)CO)OP(=O)(O)OP(=O)(O)OCC2C(C(C(O2)N3C=CC(=O)NC3=O)O)O)NC(=O)C	0.774287	0.803688	28.1829	27.9812	0.800318	0.999746	2
2C4J	A	1219	GSO	c1ccc(cc1)C(CSCC(C(=O)NCC(=O)O)NC(=O)CCC(C(=O)O)N)O	0.907235	0.92278	11.0839	10.5263	0.376206	0.369673	2
7M02	A	401	YL7	CC(C)CC(C(=O)NC(CC1CC=NC1=O)C(O)S(=O)(=O)O)NC(=O)OCc2ccccc2F	0.70037	0.70037	15.9069	17.0308	0.700608	0.084795	1
8TA1	A	204	NAP	c1cc(c[n+](c1)C2C(C(C(O2)COP(=O)([O-])OP(=O)(O)OCC3C(C(C(O3)n4cnc5c4ncnc5N)OP(=O)(O)O)O)O)O)C(=O)N	0.958429	0.958429	12.0567	11.9962	1.04074	1.03331	1
2ASP	A	500	RGC	CC1C=CC(CC(C(C2CC(=CC(=O)O2)CC(CC(=CC=CC(=O)OC(C(C=CC(CC1OC)OC)C)C(C)C(C(C)CCC(=O)C(C)C(CCC(=O)O)OC)OC)C)OC)C)OC)OC	0.861198	0.861198	38.6254	38.6322	0.896325	0.947023	1
2FT2	A	999	C28	c1cc(ccc1C(C(F)(F)F)NC(CS(=O)(=O)N2CCOCC2)C(=O)NC3(CC3)CN)F	0.851454	0.865828	13.9031	13.468	0.86074	0.998532	3
8F5V	A	201	XGZ	CC(=O)NC(CS)C(=O)NC1C(C(C(OC1OC2C(C(C(C(C2O)O)O)O)O)CO)O)O	0.830443	0.839994	17.1898	17.8424	0.427339	0.742461	2
2H44	A	301	7CA	CC1C(C(C(C(O1)OC2=C(Oc3c(c(cc(c3C2=O)O)O)CCC(C)C)c4ccc(cc4)OC)O)O)O	0.71513	0.753157	10.2503	8.44555	0.684385	1.02863	1
8HVM	A	401	4WI	CC1(C2C1C(N(C2)C(=O)C(C(C)(C)C)NC(=O)C(F)(F)F)C(=O)NC(CC3CCNC3=O)C=N)C	0.864101	0.875275	14.9293	14.307	0.924061	0.973525	2
7LZV	A	402	YLS	CC(C)CC(C(=O)NC(CC1CCNC1=O)C(O)S(=O)(=O)O)NC(=O)OCc2ccc(cc2)F	0.637368	0.637368	13.1798	16.1632	0.494118	0.03767	1
2FQ6	A	700	P3F	Cc1c(c(c(cn1)COP(=O)(O)O)C=NNC(=O)CNC(=O)c2ccccc2C(F)(F)F)O	0.640884	0.739983	10.998	9.14263	0.19804	0.13914	3
7SFH	A	401	91I	CC1(C2C1C(N(C2)C(=O)CCc3ccccc3)C(=O)NC(CC4CCNC4=O)C(C(=O)N)O)C	0.756266	0.780755	14.0286	12.4312	0.888126	0.806452	2
3Q00	A	302	PMJ	c1ccc(cc1)CS(=O)(=O)NC(CCCNC(=N)N)C(=O)NCC(=O)NCc2ccc(cc2)C(=N)N	0.901153	0.91511	11.2253	9.70269	0.16018	0.336605	2
2W3B	A	201	NDP	c1nc(c2c(n1)n(cn2)C3C(C(C(O3)COP(=O)(O)OP(=O)(O)OCC4C(C(C(O4)N5C=CCC(=C5)C(=O)N)O)O)O)OP(=O)(O)O)N	0.944738	0.944738	10.8196	11.9865	0.989474	0.981708	1
1SHH	B	301	0G6	c1ccc(cc1)CC(C(=O)N2CCCC2C(=O)NC(CCCNC(=[NH2+])N)C(CCl)O)N	0.9011	0.9011	12.0388	12.0212	0.965192	1.04265	1
7VLP	A	401	4WI	CC1(C2C1C(N(C2)C(=O)C(C(C)(C)C)NC(=O)C(F)(F)F)C(=O)NC(CC3CCNC3=O)C=N)C	0.878273	0.878273	14.49	14.4857	0.983353	1.01213	1
1Z2O	X	2699	I4P	C1(C(C(C(C(C1OP(=O)(O)O)OP(=O)(O)O)O)OP(=O)(O)O)OP(=O)(O)O)O	0.840181	0.840181	17.4613	17.2439	0.720341	0.722023	1
6BFD	A	401	DJS	CCC(C)Nc1cc(cc(n1)S(=O)(=O)C)C(=O)NC(Cc2ccccc2)C(C3CCCN3)O	0.88827	0.88827	17.5198	18.4181	0.892518	1.01511	1
6BC7	A	301	SIS	CC1(COC(C(C1NC)O)OC2C(CC(C(C2O)OC3C(CC=C(O3)CN)N)N)N)O	0.860871	0.846161	18.4863	18.4856	0.758151	0.928451	1
5Z6J	A	202	NAP	c1cc(c[n+](c1)C2C(C(C(O2)COP(=O)([O-])OP(=O)(O)OCC3C(C(C(O3)n4cnc5c4ncnc5N)OP(=O)(O)O)O)O)O)C(=O)N	0.863658	0.863658	12.0494	11.6524	0.910947	1.00287	1
2FZ8	A	500	NAP	c1cc(c[n+](c1)C2C(C(C(O2)COP(=O)([O-])OP(=O)(O)OCC3C(C(C(O3)n4cnc5c4ncnc5N)OP(=O)(O)O)O)O)O)C(=O)N	0.957652	0.957652	14.1357	13.9417	0.991575	1.05016	1
3PWC	A	481	ANH	Cc1ccc(cc1)S(=O)(=O)NCC(=O)NC(Cc2cccc(c2)C(=N)N)C(=O)OC	0.66463	0.707469	12.8129	12.7531	0.611408	0.692305	3
2RJ4	A	356	AD7	CCCCCCCCOC1C(C(C(C(O1)CO)O)N)OC2CC(C(C(O2)C)O)O	0.756441	0.756441	11.5538	11.5463	0.465202	0.578517	1
1CGH	A	1	1ZG	CC(C)C(C(=O)N1CCCC1C(=O)NC(Cc2ccccc2)P(=O)(O)O)NC(=O)CCC(=O)O	0.882967	0.882967	15.7049	15.7049			1
1X8R	A	601	SC1	CC(C(=O)O)(OC1CC(=CC(C1O)OP(=O)(O)O)C(=O)O)P(=O)(O)O	0.960979	0.960979	13.3139	13.3239	0.917982	1.01007	1
1I5G	A	401	TS5	C(CCNCCCNC(=O)CNC(=O)C(CS)NC(=O)CCC(C(=O)O)N)CN	0.632392	0.632196	10.2589	9.70631	0.641274	0.595666	1
7LTY	A	701	YD7	CC(C)OC1CN(C1)C(=O)NC2CCCCc3c2ccc(c3)c4ccnc(n4)Nc5cnn(c5)C	0.884612	0.903144	13.6078	12.4298	0.88739	1.00292	1
2HV5	A	500	NAP	c1cc(c[n+](c1)C2C(C(C(O2)COP(=O)([O-])OP(=O)(O)OCC3C(C(C(O3)n4cnc5c4ncnc5N)OP(=O)(O)O)O)O)O)C(=O)N	0.951681	0.951681	13.6472	13.4324	0.99872	1.01191	1
2FQ9	A	999	CRJ	c1cc(ccc1C(C(F)(F)F)NC(CS(=O)(=O)CC2CCC(=O)N2)C(=O)NC3(CC3)C#N)F	0.939495	0.939495	13.0143	12.8402	0.930699	1.01788	1
9BOO	A	401	YDL	CC(C)(C)C(C(=O)N1CC(CC1C(=O)NC(CC2CCNC2=O)C=N)C(F)(F)F)NC(=O)OC	0.814976	0.812903	14.4602	14.7455	0.858445	0.988093	1
2PJ3	A	401	86A	[H]N=C(N)Nc1cccc(c1)C(C(=O)O)OP(=O)(C(C(C)C)NC(=O)CCc2ccccc2)O	0.900387	0.900387	16.441	16.4315	0.793624	0.937174	1
4HWS	A	702	1B3	CC(C(C(=O)NS(=O)(=O)c1cccc(c1)c2ccc3c(c2)nc(nc3N)Cl)N)O	0.957107	0.957107	10.8529	10.6987	0.945332	1.0366	1
6EU5	A	501	MYA	CCCCCCCCCCCCCC(=O)SCCNC(=O)CCNC(=O)C(C(C)(C)COP(=O)(O)OP(=O)(O)OCC1C(C(C(O1)n2cnc3c2ncnc3N)O)OP(=O)(O)O)O	0.906601	0.906601	14.8573	14.0276	0.909063	0.94485	1
7LKS	A	402	Y4P	CC(C)CC(C(=O)NC(CC1CCNC1=O)C(O)S(=O)(=O)O)NC(=O)OCC2CC3CCC2C3	0.720647	0.725742	11.8735	11.9127	0.755347	0.851546	2
1MXF	A	1277	NDP	c1nc(c2c(n1)n(cn2)C3C(C(C(O3)COP(=O)(O)OP(=O)(O)OCC4C(C(C(O4)N5C=CCC(=C5)C(=O)N)O)O)O)OP(=O)(O)O)N	0.875043	0.919088	12.2997	13.3504	0.661594	0.777764	2
6M0K	A	405	FJC	c1ccc2c(c1)cc([nH]2)C(=O)NC(Cc3cccc(c3)F)C(=O)NC(CC4CCNC4=O)C=O	0.833729	0.88078	10.5386	10.4481	0.371324	0.516835	3
2RJ1	A	452	BHE	CCCCCCCCOC1C(C(C(C(O1)CO)O)O)OC2C(C(C(C(O2)C)O)O)O	0.932582	0.932582	11.0584	11.0684	0.823839	0.959832	1
8TPC	A	500	JJC	c1ccc(cc1)CNC(=O)C(c2cccnc2)N(c3ccc(cc3)NC(=O)CCl)C(=O)c4ccco4	0.850421	0.852399	10.3596	10.0366	0.0872645	0.0996382	1
6KAZ	A	502	P7F	CCC(C(=O)O)Oc1cccc(c1)CN(CCCOc2ccc(cc2)OC)c3nc4ccccc4o3	0.941319	0.941319	13.9196	13.8168	0.932496	1.02709	1
9BO8	A	401	UED	CC(C)CC(C(=O)NC(CC1CCNC1=O)CO)NC(=O)OCc2ccccc2	0.899998	0.899998	12.1622	10.8675	0.850486	0.981899	1
2ZQD	A	301	CAZ	CC(C)(C(=O)O)ON=C(c1csc(n1)N)C(=O)NC(C=O)C2N=C(C(=C)CS2)C(=O)O	0.896395	0.906134	19.0874	19.6687	0.688555	0.666789	2
2ASM	A	500	RGA	CC1C=CC(CC(C(C2CC(=CC(=O)O2)CC(CC(=CC=CC(=O)OC(C(C=CC(CC1OC)OC)C)C(C)C(C(C)CCC(=O)C(C)C(CC=CN(C)C=O)OC)OC)C)OC)C)OC)OC	0.665818	0.678622	39.015	38.3666	0.844233	0.93879	1
5UWK	A	306	8OM	CC(C)C(C(=O)O)NS(=O)(=O)c1ccc(cc1)c2ccc(cc2)CSC3=NC4=C(CCC4)C(=O)N3	0.885967	0.89077	13.1773	13.1691	0.856434	0.998786	1
2W13	A	1204	WR2	CC(C)CC(C(CNC(=O)c1nccs1)C(=O)NO)C(=O)NC(C(=O)NC)C(C)(C)C	0.829687	0.837626	16.0249	16.8391	0.849673	0.833706	2
8UTE	A	501	XKQ	CC(C)(C)C(C(=O)N1CC2CCCC2C1C(=O)NC(CCC(C)(F)F)C(C(=O)NC)O)NC(=O)OC	0.926146	0.926146	22.8579	17.5472	0.902698	0.962549	1
6QDH	A	1001	MYA	CCCCCCCCCCCCCC(=O)SCCNC(=O)CCNC(=O)C(C(C)(C)COP(=O)(O)OP(=O)(O)OCC1C(C(C(O1)n2cnc3c2ncnc3N)O)OP(=O)(O)O)O	0.87987	0.87987	13.4678	14.0048	0.946868	0.991165	1
1V2T	T	800	ANH	Cc1ccc(cc1)S(=O)(=O)NCC(=O)NC(Cc2cccc(c2)C(=N)N)C(=O)OC	0.601409	0.62454	14.4995	13.516	0.486065	0.765943	2
5WA9	A	201	9ZD	CC(C(=O)OC)NP(=O)(O)OCC1C(C(C(O1)n2cnc3c2ncnc3N)O)O	0.951147	0.951147	12.9917	13.2132	0.532567	0.691426	1
7KCW	A	401	NFF	CCOc1ccc2ccccc2c1C(=O)NC(C=O)C3NC(C(S3)(C)C)C(=O)O	0.856535	0.863567	13.0412	11.8926	0.628556	0.737394	2
2BUE	A	1200	COA	CC(C)(COP(=O)(O)OP(=O)(O)OCC1C(C(C(O1)n2cnc3c2ncnc3N)O)OP(=O)(O)O)C(C(=O)NCCC(=O)NCCS)O	0.715794	0.716869	11.2251	10.8766	0.592672	0.644021	2
2GG9	A	801	U16	CC(C)CC(C(=O)OC)NC(=O)C(C)NC(=O)C(C(c1ccc(cc1)C(C)C)N)O	0.866113	0.885242	24.1838	23.5746	0.280342	0.551421	2
2V6K	A	1213	TGG	C(CC(=O)NC(CSC(CC(=O)O)C(=O)O)C(=O)NCC(=O)O)C(C(=O)O)N	0.908097	0.908097	13.6826	12.9955	0.946332	1.02052	1
2OVY	A	999	PFJ	COc1cc2c(cc1OC)ncnc2N3CCC(C3)Oc4cnc5ccccc5n4	0.805954	0.832643	12.9055	10.6123	0.687277	0.756402	3
8V9H	A	301	Y33	CC(C(C(=O)O)C1(CC(=C(N1)C(=O)O)SC2CC(NC2)C(=O)N(C)C)C)O	0.869875	0.869875	12.9262	13.0152	0.395804	0.581122	1
2IYF	A	1400	ERY	CCC1C(C(C(C(=O)C(CC(C(C(C(C(C(=O)O1)C)OC2CC(C(C(O2)C)O)(C)OC)C)OC3C(C(CC(O3)C)N(C)C)O)(C)O)C)C)O)(C)O	0.875094	0.875094	18.7601	19.3577	0.853731	0.977935	1
1H0A	A	1164	I3P	C1(C(C(C(C(C1OP(=O)(O)O)O)OP(=O)(O)O)OP(=O)(O)O)O)O	0.895077	0.901268	12.446	12.7376	0.867433	1.02845	2
7MQM	A	301	COA	CC(C)(COP(=O)(O)OP(=O)(O)OCC1C(C(C(O1)n2cnc3c2ncnc3N)O)OP(=O)(O)O)C(C(=O)NCCC(=O)NCCS)O	0.879703	0.879703	11.8363	10.6751	0.907106	0.964126	1
2PJ5	A	401	11B	[H]N=C(N)Nc1cccc(c1)C(C(=O)O)OP(=O)(C(CCCCC)NC(=O)OCc2ccccc2)O	0.899363	0.907195	14.7428	15.4061	0.51447	0.722954	2
2PD5	A	500	NAP	c1cc(c[n+](c1)C2C(C(C(O2)COP(=O)([O-])OP(=O)(O)OCC3C(C(C(O3)n4cnc5c4ncnc5N)OP(=O)(O)O)O)O)O)C(=O)N	0.958089	0.958089	14.1116	13.8057	0.987096	1.00392	1
6CYQ	A	301	CE4	CON=C(c1csc(n1)N)C(=O)NC(C2N=C(C(=C)CS2)C(=O)O)C(=O)O	0.848807	0.848807	21.1812	15.6695	0.777421	0.772396	1
1V2W	T	800	ANH	Cc1ccc(cc1)S(=O)(=O)NCC(=O)NC(Cc2cccc(c2)C(=N)N)C(=O)OC	0.556218	0.62163	13.5939	13.332	0.367143	0.624891	2
7JQ0	A	401	VHV	CC(C)CC(C(=O)NC(CC1CCNC1=O)CO)NC(=O)C(C(C)C)NC(=O)OCc2ccccc2	0.416024	0.444871	22.6802	23.1815	0.256863	0.380081	3
2DUZ	A	500	NAP	c1cc(c[n+](c1)C2C(C(C(O2)COP(=O)([O-])OP(=O)(O)OCC3C(C(C(O3)n4cnc5c4ncnc5N)OP(=O)(O)O)O)O)O)C(=O)N	0.864599	0.864599	13.9544	13.6117	0.955552	0.986015	1
1H10	A	1118	4IP	C1(C(C(C(C(C1OP(=O)(O)O)OP(=O)(O)O)OP(=O)(O)O)O)OP(=O)(O)O)O	0.97128	0.97128	17.5693	17.8846	1.02141	1.01252	1
2CIB	A	1450	CM6	c1ccc(cc1)C(C(=O)Nc2ccncc2)NS(=O)(=O)c3cccc4c3nsn4	0.854521	0.854521	10.1258	9.92821	0.915387	0.938161	1
2PDB	A	500	NAP	c1cc(c[n+](c1)C2C(C(C(O2)COP(=O)([O-])OP(=O)(O)OCC3C(C(C(O3)n4cnc5c4ncnc5N)OP(=O)(O)O)O)O)O)C(=O)N	0.950864	0.950864	14.252	13.7899	0.980405	1.02001	1
1V2R	T	800	ANH	Cc1ccc(cc1)S(=O)(=O)NCC(=O)NC(Cc2cccc(c2)C(=N)N)C(=O)OC	0.705612	0.739861	14.2127	13.5002	0.650149	0.649976	2
2PJ0	A	401	922	[H]N=C(N)Nc1cccc(c1)C(C(=O)O)OP(=O)(C(C(C)C)NC(=O)OCc2ccccc2)O	0.943089	0.943089	19.1186	19.2055	0.32748	0.529951	1
2W15	A	1204	WR2	CC(C)CC(C(CNC(=O)c1nccs1)C(=O)NO)C(=O)NC(C(=O)NC)C(C)(C)C	0.933855	0.933855	16.0486	15.6972	0.7733	0.767894	1
1N7H	A	601	NDP	c1nc(c2c(n1)n(cn2)C3C(C(C(O3)COP(=O)(O)OP(=O)(O)OCC4C(C(C(O4)N5C=CCC(=C5)C(=O)N)O)O)O)OP(=O)(O)O)N	0.94297	0.94297	14.0248	14.1803	0.936723	0.936243	1
1VSN	A	283	NFT	CC(C)CC(C(=O)NCCN)NC(c1ccc(cc1)c2ccc(cc2)S(=O)(=O)N)C(F)(F)F	0.865666	0.865666	13.5019	13.7656	0.828463	0.958246	1
2Y66	A	500	N04	c1cc(cc(c1)C(=O)NC(CCC(=O)O)C(=O)O)COc2cccc(c2)C=C3C(=O)NC(=O)S3	0.872941	0.872941	10.2764	10.1566	0.167908	0.295896	1
8F46	A	401	XCK	CC(C)CC(C(=O)NC(CC1CCNC1=O)C=N)NC(=O)OCC(C)(C)Sc2ccccc2	0.870813	0.870813	15.8475	13.8697	0.197962	0.255488	1
3Q44	A	1086	D50	CC(C)CC(C(=O)O)NC(=O)C(C(Cc1ccc(cc1)OCc2ccccc2)N)O	0.87879	0.87879	15.0429	13.8655	0.69571	0.931857	1
6W79	A	402	X77	CC(C)(C)c1ccc(cc1)N(C(c2cccnc2)C(=O)NC3CCCCC3)C(=O)c4c[nH]cn4	0.826151	0.826151	11.5687	11.5059	0.370198	0.697176	1
7KI9	A	201	NAP	c1cc(c[n+](c1)C2C(C(C(O2)COP(=O)([O-])OP(=O)(O)OCC3C(C(C(O3)n4cnc5c4ncnc5N)OP(=O)(O)O)O)O)O)C(=O)N	0.904434	0.904434	11.6151	11.659	0.977023	1.02391	1
2P39	B	2	YYJ	C(C1C(C(C(O1)(COS(=O)(=O)O)O)OS(=O)(=O)O)OS(=O)(=O)O)OS(=O)(=O)O	0.896019	0.896019	10.102	9.99905	0.882699	0.974424	1
2RJ8	A	452	BHE	CCCCCCCCOC1C(C(C(C(O1)CO)O)O)OC2C(C(C(C(O2)C)O)O)O	0.934793	0.934793	11.1287	11.0763	0.866841	0.978178	1
1U4G	A	800	HPI	c1ccc(cc1)CCC(C(=O)O)NC(Cc2ccccc2)C(=O)NC(CC(=O)O)C(=O)N	0.678505	0.678505	18.8215	18.4125	0.775958	0.937486	1
2OD3	B	301	0G6	c1ccc(cc1)CC(C(=O)N2CCCC2C(=O)NC(CCCNC(=[NH2+])N)C(CCl)O)N	0.821327	0.821327	11.859	11.9764	0.82762	1.02477	1
2PDM	A	500	NAP	c1cc(c[n+](c1)C2C(C(C(O2)COP(=O)([O-])OP(=O)(O)OCC3C(C(C(O3)n4cnc5c4ncnc5N)OP(=O)(O)O)O)O)O)C(=O)N	0.944919	0.944919	13.962	13.4428	0.967865	1.02563	1
1V2O	T	800	ANH	Cc1ccc(cc1)S(=O)(=O)NCC(=O)NC(Cc2cccc(c2)C(=N)N)C(=O)OC	0.407745	0.49255	14.7966	13.4868	0.316073	0.42165	3
2P0D	A	800	I3P	C1(C(C(C(C(C1OP(=O)(O)O)O)OP(=O)(O)O)OP(=O)(O)O)O)O	0.901806	0.916154	12.4508	12.367	0.895365	1.02778	1
5ZJ6	A	601	VSE	CN1CCN(CC1)C2CCC(CC2)n3cc(c4c3ncnc4N)c5ccc(cc5)Oc6ccccc6	0.881863	0.89179	10.6771	10.7602	0.952117	0.933927	1
1PWG	A	400	HE0	CC1(C(NC(S1)C(C=O)NC(=O)CCCCC(C(=O)O)NC(=O)CN)C(=O)O)C	0.937329	0.937329	15.5914	15.3433	0.698187	0.790218	1
6IYV	B	501	2RG	CC1C(C(=NC1C(C=O)C(C)O)C(=O)O)SC2CC(NC2)C(=O)Nc3cccc(c3)C(=O)O	0.902877	0.902877	16.3989	15.6206	0.822989	0.936357	1
2AIO	A	1	MX1	COC(C1N=C(C(=C)CO1)C(=O)O)(C(=O)O)NC(=O)C(c2ccc(cc2)O)C(=O)O	0.852704	0.852704	16.8732	11.8385	0.845003	0.944849	1
6BFP	A	302	DJY	COc1cc(c(cc1C=C)C(=O)Nc2ccc(cc2)C(=N)N)c3ccc(nc3C(=O)O)C(=O)NCC4CC4	0.818262	0.818262	12.4547	11.6055	0.441829	0.697883	1
6C79	A	301	CE3	CC(=O)OCC1=C(N2C(C(C2=O)NC(=O)C(=NOC)c3csc(n3)N)SC1)C(=O)O	0.837674	0.837674	11.4465	13.4783	0.726293	0.8752	1
2YOG	A	211	74X	CC1=CN(C(=O)NC1=O)C2CC(C(O2)CNC(=S)Nc3ccc(c(c3)C(F)(F)F)Cl)O	0.870534	0.936929	11.4206	4.59387	0.150489	0.181574	2
7PHZ	A	401	X77	CC(C)(C)c1ccc(cc1)N(C(c2cccnc2)C(=O)NC3CCCCC3)C(=O)c4c[nH]cn4	0.949531	0.949531	12.6028	11.5204	0.789779	0.742333	1
5XDQ	A	606	PGV	CCCCCCCCCCCCCCCC(=O)OCC(COP(=O)(O)OCC(CO)O)OC(=O)CCCCCCCCCC=CCCCCCC	0.772209	0.772209	11.9571	11.9571			1
2OVV	A	999	PFH	COc1cc2c(cc1OC)ncnc2N3CCC(C3)Oc4ccc5ccccc5c4	0.815569	0.825541	11.1734	9.12071	0.721877	0.832888	1
1T41	A	318	NAP	c1cc(c[n+](c1)C2C(C(C(O2)COP(=O)([O-])OP(=O)(O)OCC3C(C(C(O3)n4cnc5c4ncnc5N)OP(=O)(O)O)O)O)O)C(=O)N	0.942311	0.942311	14.4356	14.4356			1
2IKI	A	500	NAP	c1cc(c[n+](c1)C2C(C(C(O2)COP(=O)([O-])OP(=O)(O)OCC3C(C(C(O3)n4cnc5c4ncnc5N)OP(=O)(O)O)O)O)O)C(=O)N	0.891432	0.891432	14.1153	13.9181	0.959803	1.02933	1
1W1D	A	1552	4IP	C1(C(C(C(C(C1OP(=O)(O)O)OP(=O)(O)O)OP(=O)(O)O)O)OP(=O)(O)O)O	0.952432	0.960962	17.9517	16.0081	1.00604	0.96723	2
2QPU	A	3000	QPU	CC1C(C(C(C(C1O)O)O)NC2C(OC(C(C2O)O)OC3C(OCC(C3O)O)CO)C)O	0.537703	0.551811	14.6207	14.3601	0.0586901	0.284817	2
2HVN	A	500	NAP	c1cc(c[n+](c1)C2C(C(C(O2)COP(=O)([O-])OP(=O)(O)OCC3C(C(C(O3)n4cnc5c4ncnc5N)OP(=O)(O)O)O)O)O)C(=O)N	0.895612	0.895612	13.4605	13.4309	0.962053	1.02719	1
2DDF	A	3	INN	CC(C)CC(CC(=O)NO)C(=O)NC(C(=O)NC(C)C(=O)NCCN)C(C)(C)C	0.934291	0.934291	17.6873	16.7239	0.811368	0.895274	1
2RJ6	A	452	BHE	CCCCCCCCOC1C(C(C(C(O1)CO)O)O)OC2C(C(C(C(O2)C)O)O)O	0.898202	0.898202	10.9052	10.9046	0.898514	0.985235	1
8B4T	A	301	P9F	c1ccc(cc1)CC(C(=O)O)NC(=O)C(CC2CCCCC2)NC(=O)Oc3ccc(cc3)Cl	0.937134	0.937134	13.6139	12.6258	0.783194	0.884647	1
7O0O	A	304	9XS	CC1C(C(=NC1C(C(C)O)C(=O)O)C(=O)O)SC2CC(NC2)C(=O)Nc3cccc(c3)C(=O)O	0.670844	0.69605	20.9946	19.6528	0.072855	0.0843403	2
2PQ9	A	501	GG9	C1C(C(C(C=C1C(=O)O)OP(=O)(O)O)O)OC(C(F)F)(C(=O)O)OP(=O)(O)O	0.951205	0.951205	18.3429	17.8874	0.955137	1.02563	1
7PT1	A	702	3KK	CC(C)(COP(=O)(O)OP(=O)(O)OCC1C(C(C(O1)n2cnc3c2ncnc3N)O)OP(=O)(O)O)C(C(=O)NCCC(=O)NCCSC(=O)C(C)(C)O)O	0.927903	0.927903	16.282	13.6164	0.879638	0.897936	1
8OKL	A	401	83N	CC(C)C(C(=O)N1CC(CC1C(=O)NC(CC2CCNC2=O)CO)OC)NC(=O)OC(C)(C)C	0.935611	0.935611	21.8306	21.0134	0.971314	1.01037	1
2BZ6	H	1258	346	[H]N=C(c1ccc(cc1)NC(c2cc(cc(c2F)OC3CCOC3)OCC)C(=O)O)N	0.769472	0.80352	16.9713	17.8294	0.803003	0.857571	3
2RIY	A	452	BHE	CCCCCCCCOC1C(C(C(C(O1)CO)O)O)OC2C(C(C(C(O2)C)O)O)O	0.86008	0.86008	11.0709	11.0579	0.8079	0.831173	1
2PJ1	A	401	578	CC(C)C(NC(=O)OCc1ccccc1)P(=O)(O)OC(c2cccc(c2)CN)C(=O)O	0.892305	0.907955	16.1783	16.3743	0.861258	0.934686	2
1PWL	A	318	NAP	c1cc(c[n+](c1)C2C(C(C(O2)COP(=O)([O-])OP(=O)(O)OCC3C(C(C(O3)n4cnc5c4ncnc5N)OP(=O)(O)O)O)O)O)C(=O)N	0.974511	0.974511	14.5053	14.4937	0.919822	0.94901	1
3AG2	A	607	PGV	CCCCCCCCCCCCCCCC(=O)OCC(COP(=O)(O)OCC(CO)O)OC(=O)CCCCCCCCCC=CCCCCCC	0.884872	0.884872	12.985	12.985			1
2W14	A	1204	WR2	CC(C)CC(C(CNC(=O)c1nccs1)C(=O)NO)C(=O)NC(C(=O)NC)C(C)(C)C	0.812663	0.813203	15.9686	15.8494	0.816687	0.822264	2
2PDF	A	500	NAP	c1cc(c[n+](c1)C2C(C(C(O2)COP(=O)([O-])OP(=O)(O)OCC3C(C(C(O3)n4cnc5c4ncnc5N)OP(=O)(O)O)O)O)O)C(=O)N	0.902182	0.902182	13.8861	13.8248	0.954557	0.922954	1
3B69	A	700	BFN	CC(=O)NC1C(C(C(OC1C(C(CNC(=O)c2ccccc2)O)O)(C(=O)O)O)F)O	0.805858	0.807451	12.142	11.7588	0.799251	0.945128	2
7S45	A	202	ACO	CC(=O)SCCNC(=O)CCNC(=O)C(C(C)(C)COP(=O)(O)OP(=O)(O)OCC1C(C(C(O1)n2cnc3c2ncnc3N)O)OP(=O)(O)O)O	0.927465	0.927465	12.3095	11.4758	0.951861	0.939437	1
7PT4	B	701	OXT	Cc1c(sc([n+]1Cc2cnc(nc2N)C)C(O)SCCNC(=O)CCNC(=O)C(C(C)(C)COP(=O)(O)OP(=O)(O)OCC3C(C(C(O3)n4cnc5c4ncnc5N)O)OP(=O)(O)O)O)CCOP(=O)(O)OP(=O)(O)O	0.912205	0.912205	20.2252	17.2694	0.88136	0.989106	1
6PGD	A	401	OK4	CC(C)C(C(=O)N)NC(=O)C(CCCc1[nH]c(cn1)CO)NC(=O)C(C)NC(=O)C	0.95067	0.95067	22.2128	22.1389	0.887152	0.96172	1
6ELA	A	306	B9Z	COc1ccc(cc1)c2ccc(cc2)Sc3ccccc3C(CCC(=O)O)C(=O)O	0.952239	0.952239	11.2593	11.1923	0.937007	0.990249	1
2ASO	A	500	SPX	CC1C=CC(CC(C(C2C(C(=CC(=O)O2)CC(CC(=CC=CC(=O)OC(C(C=CC(CC1O)OC)C)C(C)C(C(C)CCC(=O)C(C)C(CC=CN(C)C=O)OC)OC)C)OC)O)C)OC)OC	0.751223	0.788413	35.0387	35.8161	0.530127	0.355426	2
2UX9	A	1070	COA	CC(C)(COP(=O)(O)OP(=O)(O)OCC1C(C(C(O1)n2cnc3c2ncnc3N)O)OP(=O)(O)O)C(C(=O)NCCC(=O)NCCS)O	0.667273	0.700334	11.7467	11.7149			3
2XC3	A	1434	RT8	CC1CCC(CC1)C(=O)NC(Cc2c[nH]c3c2cccc3)C(=O)Nc4ccncc4	0.7913	0.7913	10.1916	11.0516	0.693608	0.820748	1
2UUK	B	2250	897	Cc1cc(cc(c1)OCC(C)Nc2ccncc2)C(=O)N(CCC(=O)NC(C)(C)C)C(C)C	0.869815	0.869815	10.2682	10.1535	0.828217	0.72928	1
3Q07	A	301	YPP	CCN1CCN(C(=O)C1=O)C(=O)NC(c2ccccc2)C(=O)NC(C3NC(C(S3)(C)C)C(=O)O)C(=O)O	0.495407	0.495407	20.4818	21.8073	0.325817	0.0532888	1
1EWP	A	280	0I5	CC(C)CC(C(=O)NC(CCc1ccccc1)C(=O)CF)NC(=O)N2CCOCC2	0.903853	0.903853	13.2136	13.5446	0.916133	0.957569	1
7L01	A	1001	XCV	Cc1c(c[nH]c1C(=O)NC(C)c2cc([nH]n2)C#N)C3(CC3)c4ccc(nc4)C(F)(F)F	0.921998	0.921998	10.7308	10.9621	0.97671	1.02227	1
9DQW	A	502	UMA	CC(C(=O)O)NC(=O)C(C)OC1C(C(OC(C1O)CO)OP(=O)(O)OP(=O)(O)OCC2C(C(C(O2)N3C=CC(=O)NC3=O)O)O)NC(=O)C	0.907359	0.907359	27.9402	27.9214	0.958316	1.05165	1
8HUE	D	2	YYJ	C(C1C(C(C(O1)(COS(=O)(=O)O)O)OS(=O)(=O)O)OS(=O)(=O)O)OS(=O)(=O)O	0.925242	0.925242	10.1381	9.64711	0.652409	0.713797	1
1T40	A	318	NAP	c1cc(c[n+](c1)C2C(C(C(O2)COP(=O)([O-])OP(=O)(O)OCC3C(C(C(O3)n4cnc5c4ncnc5N)OP(=O)(O)O)O)O)O)C(=O)N	0.946242	0.946242	14.0114	13.4403	0.971014	1.00547	1
2PDI	A	500	NAP	c1cc(c[n+](c1)C2C(C(C(O2)COP(=O)([O-])OP(=O)(O)OCC3C(C(C(O3)n4cnc5c4ncnc5N)OP(=O)(O)O)O)O)O)C(=O)N	0.960733	0.960733	14.1211	13.7853	0.987953	1.01633	1
2HVO	A	500	NAP	c1cc(c[n+](c1)C2C(C(C(O2)COP(=O)([O-])OP(=O)(O)OCC3C(C(C(O3)n4cnc5c4ncnc5N)OP(=O)(O)O)O)O)O)C(=O)N	0.948197	0.948197	14.0246	13.39	0.992422	1.01187	1
7N4Q	A	701	0B9	c1c[nH]c2c1c(ncn2)N3CCCC(C3)NC(=O)C(C4CC4)Nc5cc(cc(c5)Cl)F	0.887505	0.887505	15.1191	13.6467	0.908067	0.977432	1
2X9G	A	1269	NAP	c1cc(c[n+](c1)C2C(C(C(O2)COP(=O)([O-])OP(=O)(O)OCC3C(C(C(O3)n4cnc5c4ncnc5N)OP(=O)(O)O)O)O)O)C(=O)N	0.964888	0.964888	12.7713	12.7713			1
7MU3	A	302	ZOA	CCOC(=O)c1cnc2c(cnn2c1C)NC(=S)NCc3ccc(cc3)S(=O)(=O)N	0.828315	0.853085	14.249	15.2152	0.192384	0.308641	2
7QKB	A	406	UED	CC(C)CC(C(=O)NC(CC1CCNC1=O)CO)NC(=O)OCc2ccccc2	0.714443	0.714443	10.5587	15.6615	0.202702	0.24233	1
6FDC	B	605	D5N	c1cc(c(cc1c2ccnn2CC(CN3CCOCC3)O)OC4CCCC4)OC(F)F	0.775928	0.775209	12.4495	11.8433	0.180015	0.28065	2
7KI8	A	201	NAP	c1cc(c[n+](c1)C2C(C(C(O2)COP(=O)([O-])OP(=O)(O)OCC3C(C(C(O3)n4cnc5c4ncnc5N)OP(=O)(O)O)O)O)O)C(=O)N	0.956043	0.956043	11.743	11.6199	1.00012	1.02377	1
2RG6	A	501	287	Cc1ccc(cc1Nc2c3c(c(cn3ncn2)C(=O)NC(C)c4ccccc4)C)C(=O)NOC	0.886777	0.886777	13.8703	12.3356	0.92757	1.01416	1
2YNE	A	1000	NHW	CCCCCCCCCCCCCC(=O)CSCCNC(=O)CCNC(=O)C(C(C)(C)COP(=O)(O)OP(=O)(O)OCC1C(C(C(O1)n2cnc3c2ncnc3N)O)OP(=O)(O)O)O	0.894953	0.894953	11.9468	11.2549	0.894656	1.02379	1
2RJ9	A	356	AD7	CCCCCCCCOC1C(C(C(C(O1)CO)O)N)OC2CC(C(C(O2)C)O)O	0.875006	0.875006	11.2179	11.1466	0.79446	0.897922	1
1RXP	A	991	169	CC(C)(C)NC(=O)N1CCN(CC1)C(=O)NC(C(CCCNC(=N)N)C=O)C(=O)O	0.762802	0.803581	12.2659	10.1018	0.112028	0.155272	2
5N31	E	410	8LB	CC(C)CC(C(=O)NC(CCCCN)C(=O)O)NP(=O)(CNC(=O)OCc1ccccc1)O	0.880046	0.883998	14.1017	15.3612	0.813892	0.896538	3
