# Supplementary material for: Expanding automated multiconformer ligand modeling to macrocycles and fragments
Source: eLife. 2025 Jun 30;14:RP103797. doi: 10.7554/eLife.103797 (PMC12208665; doi:10.7554/eLife.103797)
Supplement: Supplementary file 3. [file elife-103797-supp3.xlsx]

## Sheet: Sheet1
PDBID	Deposited RSCC	qFit-ligand RSCC	Deposited Strain	qFit-ligand Strain	qFit-ligand Number of Conformers	Resolution	Rfree_qFit	Rwork_qFit	Deposited EDIAm	qFit-ligand EDIAm
5LOV	0.877614	0.877614	10.1995	10.4354	1	2.4	0.258	0.22
4ZXY	0.699152	0.798645	4.19635	4.07553	3	2.06	0.205	0.186
2XBK	0.861199	0.861199	10.1346	6.38101	1	1.95	0.218	0.184	0.835871	0.796055
4P3O	0.864872	0.894236	5.15149	5.1361	2	2.505	0.212	0.177
3INX	0.827816	0.842473	3.4335	2.88192	3	1.75	0.189	0.161	0.795034	0.750009
2CA0	0.732995	0.751296	10.7747	10.6676	3	2.85	0.335	0.269
4Z2H	0.928306	0.928306	14.017	10.2176	1	2.35	0.184	0.158
4KTC	0.889107	0.889107	16.277	13.1076	2	2.3	0.245	0.203
4Z2L	0.889627	0.925835	12.7877	10.6444	1	2.3	0.192	0.164
1W96	0.874249	0.88538	12.5393	12.3683	2	1.8	0.209	0.177	0.776475	0.911297
2CD8	0.840966	0.862512	10.4234	10.7056	3	1.7	0.32	0.292	0.616683	0.826478
4P3N	0.892628	0.919284	5.36798	5.29719	2	2.6	0.236	0.2044
2X00	0.878347	0.901776	2.69791	7.14715	2	2.4	0.217	0.178
5L2Y	0.73913	0.782231	6.70622	6.45521	3	1.82	0.18	0.163	0.791982	0.610093
4TV8	0.890051	0.862725	10.4676	9.79143	1	2.103	0.244	0.211
3K5C	0.922305	0.928671	7.02119	9.497	1	2.12	0.207	0.178
2C7X	0.874361	0.874361	10.6295	10.8851	1	1.75	0.205	0.177	0.348589	0.691875
3R92	0.882064	0.898826	0.855322	0.710043	2	1.5801	0.193	0.174	0.694915	0.963156
5BQX	0.617403	0.696175	3.27587	3.32322	3	2	0.2304	0.2031	0.249283	0.190439
2C78	0.808385	0.798906	28.1115	28.2426	3	1.4	0.1891	0.1758	0.813046	0.56526
2F3E	0.831656	0.831656	18.1448	20.253	1	2.11	0.22	0.184
4X7Z	0.90926	0.90926	17.638	17.638	1	1.44	0.1729	0.1418	0.759571	0.747822
4QK8	0.757559	0.842828	3.45379	3.32082	2	3.05	0.2	0.187
4B7S	0.889409	0.889409	2.37595	2.37595	1	1.84	0.1974	0.1696	0.669191	0.662317
1ZZ5	0.679662	0.737056	7.72985	7.4654	2	3	0.2599	0.2277
2C6H	0.90692	0.90692	10.56	10.5693	1	2.35	0.208	0.173
3INW	0.862251	0.868708	1.99256	1.28783	2	1.95	0.225	0.1883	0.862061	0.820831
3ZSN	0.810516	0.810516	21.4636	21.6436	2	1.9	0.223	0.188	0.477459	0.477459
4JQL	0.892039	0.892039	14.7733	15.5832	1	1.72	0.198	0.177
4YCM	0.848834	0.862613	14.3844	14.9737	1	3.2	0.302	0.252
2YJE	0.752305	0.781368	0.384594	0.505558	1	3.1	0.3	0.257
3QTF	0.863322	0.876643	1.00135	0.977155	2	1.5703	0.211	0.196	0.735418	0.995162
5EQR	0.923263	0.912291	14.2522	15.2535	1	1.96	0.199	0.171
3RKZ	0.82346	0.846905	3.69402	3.4304	3	1.5693	0.186	0.171	0.862638	1.06407
4Z2G	0.791384	0.813154	11.4159	6.80522	2	2.6	0.284	0.245
2V51	0.841453	0.855373	0.8204	0.761269	3	2.35	0.246	0.195
4GMI	0.879154	0.879154	5.84019	5.85702	1	1.8	0.189	0.154	0.914443	1.01244
4YLA	0.919575	0.92465	2.72432	2.6863	2	1.4	0.186	0.148	0.891278	0.974488
4P3P	0.840656	0.891492	5.26944	5.21364	3	2.1	0.199	0.171
3JRX	0.819453	0.849326	12.9666	12.6831	3	2.5	0.2437	0.2071
4U01	0.842243	0.888381	14.0008	12.7943	2	2.8	0.304	0.251
2J0D	0.708658	0.745314	18.6064	18.5776	2	2.75	0.2397	0.2046
4YZL	0.881701	0.896185	2.71872	2.64985	3	2.096	0.222	0.184
2AOA	0.725479	0.730036	8.22511	11.1244	3	1.99	0.3089	0.2781	0.386806	0.366134
4CPT	0.854107	0.854107	18.2938	17.8789	1	1.7	0.185	0.161	0.821309	0.910438
4LOH	0.867283	0.910413	3.26801	3.23615	3	2.25	0.2192	0.1936
3DV1	0.931007	0.931007	5.42781	5.29731	1	2.1	0.218	0.181
3ZPU	0.833687	0.833687	13.9827	13.9827	1	1.8	0.2052	0.1755	0.852784	0.896245
3BXR	0.876145	0.876145	12.2528	12.2484	1	1.6	0.191	0.162	0.896549	0.927282
4K8S	0.880471	0.9183	6.21568	6.15706	2	2.39	0.238	0.207
3DV5	0.874817	0.874817	4.13399	4.26692	1	2.1	0.204	0.174
4RN0	0.95378	0.95378	2.67766	2.70924	1	1.761	0.169	0.146	0.878946	1.01085
2IYA	0.914176	0.914176	21.4857	21.6048	1	1.7	0.179	0.153	0.721938	0.935417
4X81	0.865826	0.865826	14.2399	14.3317	1	1.59	0.187	0.169	0.286752	0.277692
2JJO	0.887365	0.887365	18.0896	18.6468	1	1.99	0.2	0.157	0.869703	0.973121
2F3F	0.924966	0.924966	5.44763	5.55193	2	2.3	0.214	0.187
3R91	0.891917	0.891917	1.0026	0.98279	1	1.579	0.201	0.181	0.919083	1.07293
4AW3	0.774335	0.807134	21.8843	21.6197	2	2.05	0.213	0.161
4XDM	0.879614	0.879614	12.4205	13.1721	2	1.5	0.199	0.151	0.862409	0.845486
3BXS	0.808031	0.824968	5.36818	5.34815	3	1.6	0.193	0.154	0.625271	0.892246
3ZPT	0.833509	0.833509	18.5899	14.4219	1	1.54	0.222	0.2022	0.890258	0.929253
3FRQ	0.850985	0.859368	18.5869	18.9979	3	1.76	0.217	0.181	0.804634	0.921162
4KE0	0.8694	0.890378	6.21094	6.18229	2	2.3	0.206	0.184
4LOI	0.869183	0.876379	3.35352	3.37772	3	1.89	0.215	0.184	0.861744	1.03354
2WZY	0.914443	0.914443	2.66081	2.6756	2	2.51	0.221	0.176
5I46	0.889055	0.889055	4.37491	4.54486	1	2.06	0.23	0.206
4B7D	0.825287	0.825287	0.407338	0.663012	2	1.89	0.239	0.209	0.303827	0.318346
3GID	0.87367	0.87367	12.4817	12.3725	2	2.3	0.218	0.179
5L2Z	0.725576	0.766718	7.6457	7.16657	3	1.79	0.204	0.18	0.758031	0.982471
4KSY	0.613974	0.688994	3.22786	4.87773	3	1.881	0.212	0.181	0.54336	0.286051
3SJH	0.905052	0.907586	5.05721	5.36546	2	1.75	0.189	0.166	0.968372	0.963975
5FBT	0.75054	0.75054	14.5538	15.073	2	2.702	0.278	0.251
5L30	0.933316	0.933316	6.60563	6.32669	1	1.73	0.19	0.17	1.00626	0.999803
