# Supplementary material for: Expanding automated multiconformer ligand modeling to macrocycles and fragments
Source: eLife. 2025 Jun 30;14:RP103797. doi: 10.7554/eLife.103797 (PMC12208665; doi:10.7554/eLife.103797)
Supplement: Supplementary file 4. [file elife-103797-supp4.xlsx]

## Sheet: Sheet1
Failed pre-qfit refinement	Incorrect geometry	Failed strain calculation
2Y46	4RN1	5BPS
2Y5N	4Z2I	3EKS
3CMP	5J2T	5BQA
3PEJ	2Q0U	5BQJ
3PEO	2VW5	4Z2K
3SU3	2Y98	1R8Q
3SU4	1XA5	5TJX
3SU5	4TUY	4TUZ
3SU6	4Z2J	4XZW
4BEI	5BQ6	2IWS
4X7U	2HKJ	3WH0
4BGE	2Q8I	1UU3
5HI4	3KEE	1JIO
5HI5	4DPF	5EG4
1NMK	4O4I	3WZM
2BDC	4O4L	3U4H
4DPI	5JH7	3U4I
4FFG	4XHE	4MG8
4M83	4KE1	3ZKP
4PC7		3VHD
4TYD		2HFK
4YCN		5EOL
5EPY		2O3Q
5GM2		3WHM
3WNE		3UYK
5VI6		3I6O
4D3H		1RE0
4F4S		4CTB
1NC2		4EGK
