# Supplementary material for: Expanding automated multiconformer ligand modeling to macrocycles and fragments
Source: eLife. 2025 Jun 30;14:RP103797. doi: 10.7554/eLife.103797 (PMC12208665; doi:10.7554/eLife.103797)
Supplement: Supplementary file 5. [file elife-103797-supp5.xlsx]

## Sheet: Sheet1
PDB	Structure_ID	Modified TP RSCC	qFit-ligand RSCC	Modified TP Strain	qFit-ligand Strain	Modified TP EDIAm	qFit-ligand EDIAm	qFit-ligand Number of Conformers	SMILES	Series	Source	AVI-ID
7HHU	x3239	0.5947	0.625941	10.0501	7.60048	0.658584	0.545739	3	OC(=O)CC(NC(=O)C=1C=NC=C2CCCC21)C=3C=CC(F)=CC3F	AVI-249	Enamine	AVI-0000528
7HHW	x3422	0.899	0.926898	3.02631	1.79277	0.296314	0.330506	3	IC1=CNC=2N=CN=C(NN3C(CCC3=O)C4=CC=CS4)C12	AVI-219	Enamine	AVI-0000724
7HC4	x3545	0.612146	0.654776	6.22719	3.99976	0.478976	0.573423	3	O=C1CCCN1NC2=NC=NC3=C2C4=C(C(NC(OCC)=O)=CC=C4)N3	AVI-4206 paper	Renslo	AVI-0003367
7HHV	x3245	0.609	0.609	7.01789	5.99214	0.797424	0.797424	1	OC(=O)CC(NC(=O)C1=CC=CC2=NC=NN12)C=3C=CC(F)=CC3F	AVI-249	Enamine	AVI-0000527
7HHX	x3430	0.729621	0.818119	3.0953	2.79672	0.806345	0.707795	3	NC(=O)C1=CNC=2N=CN=C(NN3C(CCC3=O)C4=CC=CS4)C12	AVI-219	Enamine	AVI-0000729
7HI3	x3465	0.553357	0.656969	0.750398	1.66029	0.669731	0.544265	3	ClC1=CC=2C(NN3C(CCC3=O)C4=CC=CS4)=NC=NC2N1	AVI-219	Enamine	AVI-0000688
7HCH	x2473	0.58843	0.616442	2.72571	2.99131	0.271068	0.500814	3	CC=1SC=2N=CN=C(SC=3C=CC=CC3C(=O)O)C2C1C	FrankenROCS HTS	Enamine	AVI-0000317
7HHZ	x3439	0.934684	0.934684	2.28628	0.675328	0.326528	0.662865	2	BrC1=CNC=2N=CN=C(NN3C(CCC3=O)C=4C=CC=CC4)C12	AVI-219	Enamine	AVI-0000703
7HF8	x3973	0.756694	0.799673	3.42249	1.91345	0.831787	0.779669	2	CC1=CNC=2N=CN=C(NCC3(O)CCC(O)CC3)C12	FrankenROCS core series	Renslo	AVI-0004329
7HI7	x3967	0.704625	0.775486	5.30681	4.92101	0.829937	0.890317	3	OC[C@@H](C(C)C)NC1=NC=NC2=C1C3=C(C(N)=CC=C3)N2	AVI-1504	Renslo	AVI-0004197
7HHS	x2824	0.783762	0.813203	1.53033	2.19303	0.792133	0.810213	2	O=C1CCCN1NC2=NC=NC(NC3=CC(C=NN4)=C4C=C3)=C2	AVI-219	Renslo	AVI-0000411
7HI4	x3466	0.733264	0.8109	2.34745	1.28411	0.715952	0.75468	3	ClC1=CNC=2N=CN=C(NN3C(CCC3=O)C=4C=CC=CC4)C12	AVI-219	Enamine	AVI-0000689
7HCX	x3532	0.748219	0.748219	1.78037	2.82746	0.824666	0.853627	2	OC1(CCC1)CNC2=C(C(C)=CN3)C3=NC=N2	AVI-3761	Renslo	AVI-0003571
7HI2	x3459	0.605002	0.659175	0.492223	1.50704	0.738816	0.706242	3	ClC1=CC=2C(NN3C(CCC3=O)C=4C=CC=CC4)=NC=NC2N1	AVI-219	Enamine	AVI-0000682
7HHT	x3200	0.78198	0.824321	2.71607	1.49209	0.970961	0.977913	2	O=C1CCCN1NC2=NC=NC=C2C3=C(F)C=CC=N3	AVI-219	Renslo	AVI-0000372
7HI0	x3446	0.860141	0.860141	4.45925	2.2884	0.925339	0.925339	1	CCC1=CNC=2N=CN=C(NN3C(C)CCC3=O)C12	AVI-219	Enamine	AVI-0000708
7HI6	x3955	0.704267	0.704267	5.54003	5.51882	0.883412	0.883412	1	CC(C)[C@H](CO)Nc1ncnc2[nH]c(c3cc[nH]n3)cc12	AVI-1504	Renslo	AVI-0004099
7HI1	x3454	0.821386	0.816151	0.499969	0.690653	0.315447	0.684159	3	BrC1=CC=2C(NN3C(CCC3=O)C=4C=CC=CC4)=NC=NC2N1	AVI-219	Enamine	AVI-0000712
7HHY	x3436	0.763033	0.802492	3.77825	0.867873	0.818067	0.818067	2	CCC1=CNC=2N=CN=C(NN3C(CCC3=O)C=4C=CC=CC4)C12	AVI-219	Enamine	AVI-0000700
7HI5	x3481	0.596874	0.655127	0.57088	1.90452	0.276164	0.443114	3	O=C1CCC(N1NC=2N=CN=C3NC=4C=CC=CC4C23)C5=CC=CS5	AVI-219	Enamine	AVI-0000737
