# Supplementary material for: Expanding automated multiconformer ligand modeling to macrocycles and fragments
Source: eLife. 2025 Jun 30;14:RP103797. doi: 10.7554/eLife.103797 (PMC12208665; doi:10.7554/eLife.103797)
Supplement: Supplementary file 6. [file elife-103797-supp6.xlsx]

## Sheet: README
Tab	Description
A_compounds	Summary of all compounds tested, including vendor information and assay results.
B_x-ray_detailed	Summary of crystal soaking, data collection and PanDDA analysis for X-ray datasets.
C_ligand_modeling	Summary of ligand modeling.
D_x-ray_summary	X-ray data collection and refinement statistics.

## Sheet: A_compounds
Compound information													X-ray crystallography
AVI-ID	Compound_ID	Source	Name	SMILES	SMILES_nosalt	Heavy atom count	MW (g/mol)	Salt	Stereochemistry	Geometric isomer	Purity (%)	Stock concentration (mM)	X-ray crystal structure	PDB code	Binding site
AVI-0000411	RLA-5549	UCSF	1-((6-((1H-indazol-5-yl)amino)pyrimidin-4-yl)amino)pyrrolidin-2-one	O=C1CCCN1NC2=NC=NC(NC3=CC(C=NN4)=C4C=C3)=C2	O=C1CCCN1NC2=NC=NC(NC3=CC(C=NN4)=C4C=C3)=C2	23	309.1		Achiral			100	TRUE	7HHS	Adenosine
AVI-0000372	RLA-5628	UCSF	1-((5-(3-fluoropyridin-2-yl)pyrimidin-4-yl)amino)pyrrolidin-2-one	O=C1CCCN1NC2=NC=NC=C2C3=C(F)C=CC=N3	O=C1CCCN1NC2=NC=NC=C2C3=C(F)C=CC=N3	20	273.1		Achiral			100	TRUE	7HHT	Adenosine
AVI-0000528	Z4414574579	Enamine	3-({5H,6H,7H-cyclopenta[c]pyridin-4-yl}formamido)-3-(2,4-difluorophenyl)propanoic acid	OC(=O)CC(NC(=O)C=1C=NC=C2CCCC21)C=3C=CC(F)=CC3F	OC(=O)CC(NC(=O)C=1C=NC=C2CCCC21)C=3C=CC(F)=CC3F	25	346.1		Racemic or presumed racemic or meso		100	100	TRUE	7HHU	Adenosine
AVI-0000527	Z4323034281	Enamine	3-(2,4-difluorophenyl)-3-({[1,2,4]triazolo[1,5-a]pyridin-5-yl}formamido)propanoic acid	OC(=O)CC(NC(=O)C1=CC=CC2=NC=NN12)C=3C=CC(F)=CC3F	OC(=O)CC(NC(=O)C1=CC=CC2=NC=NN12)C=3C=CC(F)=CC3F	25	346.1		Racemic or presumed racemic or meso		100	100	TRUE	7HHV	Adenosine
AVI-0000724	Z7703988206	Enamine	1-({5-iodo-7H-pyrrolo[2,3-d]pyrimidin-4-yl}amino)-5-(thiophen-2-yl)pyrrolidin-2-one	IC1=CNC=2N=CN=C(NN3C(CCC3=O)C4=CC=CS4)C12	IC1=CNC=2N=CN=C(NN3C(CCC3=O)C4=CC=CS4)C12	22	425		Racemic or presumed racemic or meso		95	100	TRUE	7HHW	Adenosine
AVI-0000729	Z7703988331	Enamine	4-{[2-oxo-5-(thiophen-2-yl)pyrrolidin-1-yl]amino}-7H-pyrrolo[2,3-d]pyrimidine-5-carboxamide	NC(=O)C1=CNC=2N=CN=C(NN3C(CCC3=O)C4=CC=CS4)C12	NC(=O)C1=CNC=2N=CN=C(NN3C(CCC3=O)C4=CC=CS4)C12	24	342.1		Racemic or presumed racemic or meso		96	100	TRUE	7HHX	Adenosine
AVI-0000700	Z7703984436	Enamine	1-({5-ethyl-7H-pyrrolo[2,3-d]pyrimidin-4-yl}amino)-5-phenylpyrrolidin-2-one hydrochloride	Cl.CCC1=CNC=2N=CN=C(NN3C(CCC3=O)C=4C=CC=CC4)C12	CCC1=CNC=2N=CN=C(NN3C(CCC3=O)C=4C=CC=CC4)C12	24	321.2	Hydrogen chloride	Racemic or presumed racemic or meso		100	100	TRUE	7HHY	Adenosine
AVI-0000703	Z7703984087	Enamine	1-({5-bromo-7H-pyrrolo[2,3-d]pyrimidin-4-yl}amino)-5-phenylpyrrolidin-2-one hydrochloride	Cl.BrC1=CNC=2N=CN=C(NN3C(CCC3=O)C=4C=CC=CC4)C12	BrC1=CNC=2N=CN=C(NN3C(CCC3=O)C=4C=CC=CC4)C12	23	371	Hydrogen chloride	Racemic or presumed racemic or meso		100	100	TRUE	7HHZ	Adenosine
AVI-0000708	Z7703984332	Enamine	1-({5-ethyl-7H-pyrrolo[2,3-d]pyrimidin-4-yl}amino)-5-methylpyrrolidin-2-one hydrochloride	Cl.CCC1=CNC=2N=CN=C(NN3C(C)CCC3=O)C12	CCC1=CNC=2N=CN=C(NN3C(C)CCC3=O)C12	19	259.1	Hydrogen chloride	Racemic or presumed racemic or meso		99	100	TRUE	7HI0	Adenosine
AVI-0000712	Z7703983940	Enamine	1-({6-bromo-7H-pyrrolo[2,3-d]pyrimidin-4-yl}amino)-5-phenylpyrrolidin-2-one hydrochloride	Cl.BrC1=CC=2C(NN3C(CCC3=O)C=4C=CC=CC4)=NC=NC2N1	BrC1=CC=2C(NN3C(CCC3=O)C=4C=CC=CC4)=NC=NC2N1	23	371	Hydrogen chloride	Racemic or presumed racemic or meso		100	100	TRUE	7HI1	Adenosine
AVI-0000682	Z7703986624	Enamine	1-({6-chloro-7H-pyrrolo[2,3-d]pyrimidin-4-yl}amino)-5-phenylpyrrolidin-2-one hydrochloride	Cl.ClC1=CC=2C(NN3C(CCC3=O)C=4C=CC=CC4)=NC=NC2N1	ClC1=CC=2C(NN3C(CCC3=O)C=4C=CC=CC4)=NC=NC2N1	23	327.1	Hydrogen chloride	Racemic or presumed racemic or meso		95	100	TRUE	7HI2	Adenosine
AVI-0000688	Z7703986663	Enamine	1-({6-chloro-7H-pyrrolo[2,3-d]pyrimidin-4-yl}amino)-5-(thiophen-2-yl)pyrrolidin-2-one hydrochloride	Cl.ClC1=CC=2C(NN3C(CCC3=O)C4=CC=CS4)=NC=NC2N1	ClC1=CC=2C(NN3C(CCC3=O)C4=CC=CS4)=NC=NC2N1	22	333	Hydrogen chloride	Racemic or presumed racemic or meso		92	100	TRUE	7HI3	Adenosine
AVI-0000689	Z7703986795	Enamine	1-({5-chloro-7H-pyrrolo[2,3-d]pyrimidin-4-yl}amino)-5-phenylpyrrolidin-2-one hydrochloride	Cl.ClC1=CNC=2N=CN=C(NN3C(CCC3=O)C=4C=CC=CC4)C12	ClC1=CNC=2N=CN=C(NN3C(CCC3=O)C=4C=CC=CC4)C12	23	327.1	Hydrogen chloride	Racemic or presumed racemic or meso		95	100	TRUE	7HI4	Adenosine
AVI-0000737	Z7703988868	Enamine	1-({9H-pyrimido[4,5-b]indol-4-yl}amino)-5-(thiophen-2-yl)pyrrolidin-2-one	O=C1CCC(N1NC=2N=CN=C3NC=4C=CC=CC4C23)C5=CC=CS5	O=C1CCC(N1NC=2N=CN=C3NC=4C=CC=CC4C23)C5=CC=CS5	25	349.1		Racemic or presumed racemic or meso		100	100	TRUE	7HI5	Adenosine
AVI-0004099	RLA-5789	UCSF	(R)-2-((6-(1H-pyrazol-3-yl)-7H-pyrrolo[2,3-d]pyrimidin-4-yl)amino)-3-methylbutan-1-ol	CC([C@@H](NC1=C2C=C(C3=NNC=C3)NC2=NC=N1)CO)C	CC([C@@H](NC1=C2C=C(C3=NNC=C3)NC2=NC=N1)CO)C	21	286.2		Single known enantiomer			100	TRUE	7HI6	Adenosine
AVI-0004197	RLA-5830	UCSF	(R)-2-((8-amino-9H-pyrimido[4,5-b]indol-4-yl)amino)-3-methylbutan-1-ol	OC[C@@H](C(C)C)NC1=NC=NC2=C1C3=C(C(N)=CC=C3)N2	OC[C@@H](C(C)C)NC1=NC=NC2=C1C3=C(C(N)=CC=C3)N2	21	285.2		Single known enantiomer			100	TRUE	7HI7	Adenosine

## Sheet: B_xray-detailed
Dataset information		Crystal soaking information				X-ray diffraction statistics															Pandda run, overall
Dataset ID	AVI-ID	Stock concentration (mM)	Transfer Volume	Soak concentration (mM)	Soak time	Strategy	Beamline	Detector	wavelength	Resolution (Å) (CC1/2 > 0.3)	Resolution cut (Å)	Resolution range - outershell (Å)	Resolution low (Å)	Spacegroup	XDS ISA	CC1/2: outer shell	Rmerge: overall	Completeness: outer shell (%)	Mosaicity (°)	Cell: a b c (Å) α β γ (°)	PanDDA input Rfree	Hit	Modeled
UCSF-P2823	AVI-0000411	100	40	10	02:32:00	Energy: 14 keV, Transmission: 100%, Beam size: 100x100 μm, Detector distance: 175 mm, Delta phi: 0.1°, Exposure time: 0.1 s, Number of images: 1800	ALS BEAMLINE 8.3.1	DECTRIS PILATUS3 6M	0.88557	0.93	0.98	0.98-1.00	44.38	P43	22.84	0.739	0.038	89.8	0.04	88.76 88.76 39.65 90.00 90.00 90.00	0.17963	TRUE	TRUE
UCSF-P3200	AVI-0000372	100	80	20	03:03:00	Energy: 14 keV, Transmission: 100%, Beam size: 100x100 μm, Detector distance: 175 mm, Delta phi: 0.2°, Exposure time: 0.2 s, Number of images: 900	ALS BEAMLINE 8.3.1	DECTRIS PILATUS3 6M	0.88557	0.94	1.02	1.02-1.04	44.32	P43	22.54	0.869	0.041	97.7	0.08	88.65 88.65 39.65 90.00 90.00 90.00	0.1875	TRUE	TRUE
UCSF-P3239	AVI-0000528	100	40	10	02:25:00	Energy: 14 keV, Transmission: 100%, Beam size: 100x100 μm, Detector distance: 175 mm, Delta phi: 0.1°, Exposure time: 0.05 s, Number of images: 1800	ALS BEAMLINE 8.3.1	DECTRIS PILATUS3 6M	0.88557	1.03	1.03	1.03-1.05	44.45	P43	14.58	0.346	0.083	94.8	0.09	88.89 88.89 39.67 90.00 90.00 90.00	0.20636	TRUE	TRUE
UCSF-P3245	AVI-0000527	100	40	10	02:28:00	Energy: 14 keV, Transmission: 100%, Beam size: 100x100 μm, Detector distance: 175 mm, Delta phi: 0.1°, Exposure time: 0.05 s, Number of images: 1800	ALS BEAMLINE 8.3.1	DECTRIS PILATUS3 6M	0.88557	0.99	1.02	1.02-1.04	44.4	P43	19.71	0.59	0.055	96.3	0.08	88.81 88.81 39.49 90.00 90.00 90.00	0.19874	TRUE	TRUE
UCSF-P3422	AVI-0000724	100	40	10	02:51:00	Energy: 14 keV, Transmission: 100%, Beam size: 100x100 μm, Detector distance: 175 mm, Delta phi: 0.1°, Exposure time: 0.05 s, Number of images: 1800	ALS BEAMLINE 8.3.1	DECTRIS PILATUS3 6M	0.88557	1.03	1.03	1.03-1.05	44.41	P43	24.48	0.561	0.048	99.1	0.08	88.82 88.82 39.56 90.00 90.00 90.00	0.19665	TRUE	TRUE
UCSF-P3430	AVI-0000729	100	40	10	02:57:00	Energy: 14 keV, Transmission: 100%, Beam size: 100x100 μm, Detector distance: 175 mm, Delta phi: 0.1°, Exposure time: 0.05 s, Number of images: 1800	ALS BEAMLINE 8.3.1	DECTRIS PILATUS3 6M	0.88557	1.01	1.01	1.01-1.03	44.4	P43	15.42	0.369	0.072	95.9	0.11	88.81 88.81 39.24 90.00 90.00 90.00	0.21296	TRUE	TRUE
UCSF-P3436	AVI-0000700	100	40	10	03:00:00	Energy: 14 keV, Transmission: 100%, Beam size: 100x100 μm, Detector distance: 175 mm, Delta phi: 0.1°, Exposure time: 0.05 s, Number of images: 1800	ALS BEAMLINE 8.3.1	DECTRIS PILATUS3 6M	0.88557	1.01	1.01	1.01-1.03	44.39	P43	27.65	0.378	0.048	97.8	0.08	88.78 88.78 39.60 90.00 90.00 90.00	0.20689	TRUE	TRUE
UCSF-P3439	AVI-0000703	100	40	10	03:02:00	Energy: 14 keV, Transmission: 100%, Beam size: 100x100 μm, Detector distance: 175 mm, Delta phi: 0.1°, Exposure time: 0.05 s, Number of images: 1800	ALS BEAMLINE 8.3.1	DECTRIS PILATUS3 6M	0.88557	1.01	1.01	1.01-1.03	44.35	P43	35.97	0.432	0.042	98.3	0.06	88.70 88.70 39.59 90.00 90.00 90.00	0.20738	TRUE	TRUE
UCSF-P3446	AVI-0000708	100	40	10	03:07:00	Energy: 14 keV, Transmission: 100%, Beam size: 100x100 μm, Detector distance: 175 mm, Delta phi: 0.1°, Exposure time: 0.05 s, Number of images: 1800	ALS BEAMLINE 8.3.1	DECTRIS PILATUS3 6M	0.88557	0.99	1	1.00-1.02	44.35	P43	19.58	0.466	0.057	89	0.07	88.71 88.71 39.49 90.00 90.00 90.00	0.19666	TRUE	TRUE
UCSF-P3454	AVI-0000712	100	40	10	03:11:00	Energy: 14 keV, Transmission: 100%, Beam size: 100x100 μm, Detector distance: 175 mm, Delta phi: 0.1°, Exposure time: 0.05 s, Number of images: 1800	ALS BEAMLINE 8.3.1	DECTRIS PILATUS3 6M	0.88557	1	1.02	1.02-1.04	44.42	P43	19.22	0.463	0.06	96.5	0.09	88.83 88.83 39.56 90.00 90.00 90.00	0.19568	TRUE	TRUE
UCSF-P3459	AVI-0000682	100	40	10	03:16:00	Energy: 14 keV, Transmission: 100%, Beam size: 100x100 μm, Detector distance: 175 mm, Delta phi: 0.1°, Exposure time: 0.05 s, Number of images: 1800	ALS BEAMLINE 8.3.1	DECTRIS PILATUS3 6M	0.88557	1.02	1.02	1.02-1.04	44.31	P43	25.9	0.32	0.06	97.5	0.09	88.62 88.62 39.38 90.00 90.00 90.00	0.1995	TRUE	TRUE
UCSF-P3465	AVI-0000688	100	40	10	03:19:00	Energy: 14 keV, Transmission: 100%, Beam size: 100x100 μm, Detector distance: 175 mm, Delta phi: 0.1°, Exposure time: 0.05 s, Number of images: 1800	ALS BEAMLINE 8.3.1	DECTRIS PILATUS3 6M	0.88557	0.98	1.02	1.02-1.04	44.38	P43	26.4	0.643	0.043	96.7	0.07	88.76 88.76 39.42 90.00 90.00 90.00	0.19223	TRUE	TRUE
UCSF-P3466	AVI-0000689	100	40	10	03:20:00	Energy: 14 keV, Transmission: 100%, Beam size: 100x100 μm, Detector distance: 175 mm, Delta phi: 0.1°, Exposure time: 0.05 s, Number of images: 1800	ALS BEAMLINE 8.3.1	DECTRIS PILATUS3 6M	0.88557	1	1	1.00-1.02	44.36	P43	23.48	0.373	0.046	94.2	0.04	88.71 88.71 39.43 90.00 90.00 90.00	0.21265	TRUE	TRUE
UCSF-P3481	AVI-0000737	100	40	10	03:30:00	Energy: 14 keV, Transmission: 100%, Beam size: 100x100 μm, Detector distance: 175 mm, Delta phi: 0.1°, Exposure time: 0.1 s, Number of images: 1800	ALS BEAMLINE 8.3.1	DECTRIS PILATUS3 6M	0.88557	0.99	1.02	1.02-1.04	44.42	P43	24.06	0.599	0.043	97	0.04	88.85 88.85 39.54 90.00 90.00 90.00	0.2091	TRUE	TRUE
UCSF-P3955	AVI-0004099	100	40	10	02:13:00	Energy: 14 keV, Transmission: 100%, Beam size: 200x75 μm, Detector distance: 170 mm, Delta phi: 0.2°, Exposure time: 0.2 s, Number of images: 900	SSRL BEAMLINE BL9-2	DECTRIS PILATUS3 6M	0.88557	0.99	0.99	0.99-1.01	44.37	P43	20.75	0.371	0.053	92.6	0.05	88.74 88.74 39.58 90.00 90.00 90.00	0.19477	TRUE	TRUE
UCSF-P3967	AVI-0004197	100	40	10	02:22:00	Energy: 14 keV, Transmission: 100%, Beam size: 200x75 μm, Detector distance: 170 mm, Delta phi: 0.2°, Exposure time: 0.2 s, Number of images: 900	SSRL BEAMLINE BL9-2	DECTRIS PILATUS3 6M	0.88557	1.01	1.09	1.09-1.11	44.37	P43	43.77	0.779	0.034	97.7	0.07	88.74 88.74 39.36 90.00 90.00 90.00	0.20394	TRUE	TRUE

## Sheet: C_ligand_modeling
Dataset information			Alternative conformation / isomer information							Refinement information			Occuppancy information
Dataset ID	AVI-ID	PDB code	Number of isomers bound	Total number of conformations	Isomers modeled	Estimated isomer ratio	Ligand CIF method	Ligand SMILES	Phe132 loop open state	Resolution (Å)	R-work	R-free	1-BDC	2*(1-BDC) (%)	Refined ligand occupancy (%)	Occupancy difference (refined_occupancy - 2*(1-BDC)
UCSF-P2823	AVI-0000411	7HHS	2	2	achiral	60:40	Generate coordinates with Schrödinger LigPrep, generate restraints with phenix.elbow (am1 optimization)	O=C1CCCN1NC1=CC(NC2=CC=C3NN=CC3=C2)=NC=N1		0.98	0.1325	0.1483	0.11	22	22	0
UCSF-P3200	AVI-0000372	7HHT	2	2	achiral	70:30	Generate coordinates with Schrödinger LigPrep, generate restraints with phenix.elbow (am1 optimization)	O=C1CCCN1NC1=NC=NC=C1C1=NC=CC=C1F		1.02	0.1368	0.1574	0.33	66	66	0
UCSF-P3239	AVI-0000528	7HHU	2	2	1	50:50	Generate coordinates with Schrödinger LigPrep, generate restraints with phenix.elbow (no optimization)	O=C(O)C[C@@H](NC(=O)C1=CN=CC2=C1CCC2)C1=CC=C(F)C=C1F		1.03	0.157	0.1793	0.13	26	26	0
UCSF-P3245	AVI-0000527	7HHV	2	2	1	70:30	Generate coordinates with Schrödinger LigPrep, generate restraints with phenix.elbow (no optimization)	O=C(O)C[C@@H](NC(=O)C1=CC=CC2=NC=NN12)C1=CC=C(F)C=C1F		1.02	0.1464	0.166	0.32	64	64	0
UCSF-P3422	AVI-0000724	7HHW	2	2	1	50:50	Generate coordinates with Schrödinger LigPrep, generate restraints with phenix.elbow (am1 optimization)	O=C1CC[C@@H](C2=CC=CS2)N1NC1=NC=NC2=C1C(I)=CN2	TRUE	1.03	0.1475	0.1682	0.16	32	32	0
UCSF-P3430	AVI-0000729	7HHX	2	2	1	50:50	Generate coordinates with Schrödinger LigPrep, generate restraints with phenix.elbow (am1 optimization)	NC(=O)C1=CNC2=NC=NC(NN3C(=O)CC[C@H]3C3=CC=CS3)=C12		1.01	0.1621	0.1825	0.33	66	66	0
UCSF-P3436	AVI-0000700	7HHY	2	2	1	40:60	Generate coordinates with Schrödinger LigPrep, generate restraints with phenix.elbow (am1 optimization)	CCC1=CNC2=NC=NC(NN3C(=O)CC[C@H]3C3=CC=CC=C3)=C12	TRUE	1.01	0.1542	0.1723	0.24	48	70	22
UCSF-P3439	AVI-0000703	7HHZ	2	2	1	40:60	Generate coordinates with phenix.elbow, generate restraints with phenix.elbow (am1 optimization)	O=C1CC[C@@H](C2=CC=CC=C2)N1NC1=NC=NC2=C1C(Br)=CN2	TRUE	1.01	0.1513	0.1696	0.31	62	80	18
UCSF-P3446	AVI-0000708	7HI0	2	2	1	60:40	Generate coordinates with Schrödinger LigPrep, generate restraints with phenix.elbow (am1 optimization)	CCC1=CNC2=NC=NC(NN3C(=O)CC[C@@H]3C)=C12		1	0.1439	0.1622	0.27	54	70	16
UCSF-P3454	AVI-0000712	7HI1	2	2	1	70:30	Generate coordinates with phenix.elbow, generate restraints with phenix.elbow (am1 optimization)	O=C1CC[C@@H](C2=CC=CC=C2)N1NC1=NC=NC2=C1C=C(Br)N2	TRUE	1.02	0.1494	0.1678	0.14	28	28	0
UCSF-P3459	AVI-0000682	7HI2	2	2	1	60:40	Generate coordinates with Schrödinger LigPrep, generate restraints with phenix.elbow (am1 optimization)	O=C1CC[C@@H](C2=CC=CC=C2)N1NC1=NC=NC2=C1C=C(Cl)N2	TRUE	1.02	0.1515	0.1709	0.2	40	60	20
UCSF-P3465	AVI-0000688	7HI3	3	3	1	50:25:25	Generate coordinates with Schrödinger LigPrep, generate restraints with phenix.elbow (am1 optimization)	O=C1CC[C@@H](C2=CC=CS2)N1NC1=NC=NC2=C1C=C(Cl)N2		1.02	0.1451	0.1623	0.13	26	26	0
UCSF-P3466	AVI-0000689	7HI4	2	2	1	60:40	Generate coordinates with Schrödinger LigPrep, generate restraints with phenix.elbow (am1 optimization)	O=C1CC[C@@H](C2=CC=CC=C2)N1NC1=NC=NC2=C1C(Cl)=CN2	TRUE	1	0.1604	0.1779	0.3	60	80	20
UCSF-P3481	AVI-0000737	7HI5	2	2	1	50:50	Generate coordinates with Schrödinger LigPrep, generate restraints with phenix.elbow (am1 optimization)	O=C1CC[C@@H](C2=CC=CS2)N1NC1=NC=NC2=C1C1=CC=CC=C1N2	TRUE	1.02	0.1541	0.1742	0.2	40	40	0
UCSF-P3955	AVI-0004099	7HI6	2	2	1	50:50	Generate coordinates with Schrödinger LigPrep, generate restraints with phenix.elbow (am1 optimization)	CC(C)[C@H](CO)NC1=NC=NC2=C1C=C(C1=NNC=C1)N2		0.99	0.1458	0.1624	0.23	46	80	34
UCSF-P3967	AVI-0004197	7HI7	2	2	1	40:60	Generate coordinates with Schrödinger LigPrep, generate restraints with phenix.elbow (am1 optimization)	CC(C)[C@H](CO)NC1=NC=NC2=C1C1=CC=CC(N)=C1N2		1.09	0.1526	0.1733	0.19	38	38	0

## Sheet: D_xray-statistics
Dataset ID	UCSF-P2823	UCSF-P3200	UCSF-P3239	UCSF-P3245	UCSF-P3422	UCSF-P3430	UCSF-P3436	UCSF-P3439	UCSF-P3446	UCSF-P3454	UCSF-P3459	UCSF-P3465	UCSF-P3466	UCSF-P3481	UCSF-P3955	UCSF-P3967
Group Deposition ID	G_1002307	G_1002307	G_1002307	G_1002307	G_1002307	G_1002307	G_1002307	G_1002307	G_1002307	G_1002307	G_1002307	G_1002307	G_1002307	G_1002307	G_1002307	G_1002307
PDB code	7HHS	7HHT	7HHU	7HHV	7HHW	7HHX	7HHY	7HHZ	7HI0	7HI1	7HI2	7HI3	7HI4	7HI5	7HI6	7HI7
AVI-ID	AVI-0000411	AVI-0000372	AVI-0000528	AVI-0000527	AVI-0000724	AVI-0000729	AVI-0000700	AVI-0000703	AVI-0000708	AVI-0000712	AVI-0000682	AVI-0000688	AVI-0000689	AVI-0000737	AVI-0004099	AVI-0004197
Beamline	ALS BEAMLINE 8.3.1	ALS BEAMLINE 8.3.1	ALS BEAMLINE 8.3.1	ALS BEAMLINE 8.3.1	ALS BEAMLINE 8.3.1	ALS BEAMLINE 8.3.1	ALS BEAMLINE 8.3.1	ALS BEAMLINE 8.3.1	ALS BEAMLINE 8.3.1	ALS BEAMLINE 8.3.1	ALS BEAMLINE 8.3.1	ALS BEAMLINE 8.3.1	ALS BEAMLINE 8.3.1	ALS BEAMLINE 8.3.1	SSRL BEAMLINE BL9-2	SSRL BEAMLINE BL9-2
Strategy	Energy: 14 keV, Transmission: 100%, Beam size: 100x100 μm, Detector distance: 175 mm, Delta phi: 0.1°, Exposure time: 0.1 s, Number of images: 1800	Energy: 14 keV, Transmission: 100%, Beam size: 100x100 μm, Detector distance: 175 mm, Delta phi: 0.2°, Exposure time: 0.2 s, Number of images: 900	Energy: 14 keV, Transmission: 100%, Beam size: 100x100 μm, Detector distance: 175 mm, Delta phi: 0.1°, Exposure time: 0.05 s, Number of images: 1800	Energy: 14 keV, Transmission: 100%, Beam size: 100x100 μm, Detector distance: 175 mm, Delta phi: 0.1°, Exposure time: 0.05 s, Number of images: 1800	Energy: 14 keV, Transmission: 100%, Beam size: 100x100 μm, Detector distance: 175 mm, Delta phi: 0.1°, Exposure time: 0.05 s, Number of images: 1800	Energy: 14 keV, Transmission: 100%, Beam size: 100x100 μm, Detector distance: 175 mm, Delta phi: 0.1°, Exposure time: 0.05 s, Number of images: 1800	Energy: 14 keV, Transmission: 100%, Beam size: 100x100 μm, Detector distance: 175 mm, Delta phi: 0.1°, Exposure time: 0.05 s, Number of images: 1800	Energy: 14 keV, Transmission: 100%, Beam size: 100x100 μm, Detector distance: 175 mm, Delta phi: 0.1°, Exposure time: 0.05 s, Number of images: 1800	Energy: 14 keV, Transmission: 100%, Beam size: 100x100 μm, Detector distance: 175 mm, Delta phi: 0.1°, Exposure time: 0.05 s, Number of images: 1800	Energy: 14 keV, Transmission: 100%, Beam size: 100x100 μm, Detector distance: 175 mm, Delta phi: 0.1°, Exposure time: 0.05 s, Number of images: 1800	Energy: 14 keV, Transmission: 100%, Beam size: 100x100 μm, Detector distance: 175 mm, Delta phi: 0.1°, Exposure time: 0.05 s, Number of images: 1800	Energy: 14 keV, Transmission: 100%, Beam size: 100x100 μm, Detector distance: 175 mm, Delta phi: 0.1°, Exposure time: 0.05 s, Number of images: 1800	Energy: 14 keV, Transmission: 100%, Beam size: 100x100 μm, Detector distance: 175 mm, Delta phi: 0.1°, Exposure time: 0.05 s, Number of images: 1800	Energy: 14 keV, Transmission: 100%, Beam size: 100x100 μm, Detector distance: 175 mm, Delta phi: 0.1°, Exposure time: 0.1 s, Number of images: 1800	Energy: 14 keV, Transmission: 100%, Beam size: 200x75 μm, Detector distance: 170 mm, Delta phi: 0.2°, Exposure time: 0.2 s, Number of images: 900	Energy: 14 keV, Transmission: 100%, Beam size: 200x75 μm, Detector distance: 170 mm, Delta phi: 0.2°, Exposure time: 0.2 s, Number of images: 900
Wavelength (Å)	0.88557	0.88557	0.88557	0.88557	0.88557	0.88557	0.88557	0.88557	0.88557	0.88557	0.88557	0.88557	0.88557	0.88557	0.88557	0.88557
Resolution range (Å)	39.69 - 0.98 (1.015 - 0.98)	39.65 - 1.02 (1.056 - 1.02)	44.45 - 1.03 (1.067 - 1.03)	39.72 - 1.02 (1.057 - 1.02)	44.41 - 1.03 (1.067 - 1.03)	39.72 - 1.01 (1.046 - 1.01)	39.7 - 1.01 (1.046 - 1.01)	39.67 - 1.01 (1.046 - 1.01)	39.67 - 1.0 (1.036 - 1.0)	44.42 - 1.02 (1.057 - 1.02)	44.31 - 1.03 (1.067 - 1.03)	44.38 - 1.02 (1.057 - 1.02)	44.36 - 1.0 (1.036 - 1.0)	39.73 - 1.02 (1.056 - 1.02)	39.69 - 0.99 (1.026 - 0.99)	39.69 - 1.09 (1.129 - 1.09)
Spacegroup	P 43	P 43	P 43	P 43	P 43	P 43	P 43	P 43	P 43	P 43	P 43	P 43	P 43	P 43	P 43	P 43
Unit cell	88.76 88.76 39.649 90 90 90	88.649 88.649 39.649 90 90 90	88.893 88.893 39.665 90 90 90	88.809 88.809 39.491 90 90 90	88.818 88.818 39.557 90 90 90	88.809 88.809 39.244 90 90 90	88.783 88.783 39.599 90 90 90	88.701 88.701 39.591 90 90 90	88.708 88.708 39.485 90 90 90	88.831 88.831 39.561 90 90 90	88.617 88.617 39.381 90 90 90	88.756 88.756 39.421 90 90 90	88.713 88.713 39.434 90 90 90	88.847 88.847 39.541 90 90 90	88.74 88.74 39.575 90 90 90	88.741 88.741 39.357 90 90 90
Total reflections	1101431 (64345)	1010487 (94192)	977261 (91766)	1009304 (90605)	983789 (93124)	1019336 (85688)	1041967 (87951)	1044949 (88754)	1047704 (79446)	1006235 (92379)	983045 (94071)	1015532 (92876)	1063020 (79939)	1026865 (93738)	1105977 (90200)	834433 (77118)
Unique reflections	175557 (16286)	156245 (15423)	152476 (14762)	156075 (15240)	152331 (15109)	159865 (15505)	161382 (15858)	161086 (15879)	164669 (15489)	156551 (15330)	150805 (14792)	155802 (15251)	164993 (15897)	156669 (15373)	170224 (16212)	127338 (12468)
Multiplicity	6.3 (4.0)	6.5 (6.1)	6.4 (6.2)	6.5 (5.9)	6.5 (6.2)	6.4 (5.5)	6.5 (5.5)	6.5 (5.6)	6.4 (5.1)	6.4 (6.0)	6.5 (6.3)	6.5 (6.1)	6.4 (5.0)	6.6 (6.1)	6.5 (5.5)	6.6 (6.2)
Completeness (%)	99.16 (92.22)	99.70 (98.82)	99.67 (97.13)	99.77 (98.08)	99.89 (99.39)	99.71 (97.32)	99.84 (98.68)	99.89 (99.05)	99.35 (93.80)	99.78 (98.22)	99.80 (98.49)	99.78 (98.30)	99.61 (96.25)	99.78 (98.48)	99.38 (95.66)	99.48 (98.14)
Mean I/sigma(I)	19.90 (2.13)	19.52 (2.88)	9.44 (1.42)	13.81 (1.85)	15.06 (1.52)	10.02 (0.86)	14.96 (1.09)	17.91 (1.61)	12.72 (1.61)	12.14 (1.43)	13.35 (0.87)	16.84 (1.87)	14.75 (1.05)	16.24 (1.81)	14.19 (1.19)	23.99 (2.11)
Wilson B-factor	9.9	9.32	10.31	10.02	11.04	10.51	11.18	10.81	10.13	10.44	10.79	10.65	11.63	11.62	10.64	11.68
R-merge	0.04148 (0.5637)	0.0444 (0.6995)	0.0905 (1.355)	0.06023 (0.9248)	0.05264 (1.213)	0.07944 (1.82)	0.05255 (1.782)	0.04733 (1.228)	0.06288 (0.8813)	0.06475 (1.114)	0.065 (2.759)	0.04721 (0.9686)	0.05064 (1.848)	0.04711 (1.152)	0.05796 (1.953)	0.03791 (1.468)
R-meas	0.04513 (0.6503)	0.04832 (0.7644)	0.09862 (1.479)	0.06552 (1.014)	0.05724 (1.325)	0.08653 (2.01)	0.0572 (1.969)	0.05147 (1.355)	0.06851 (0.9803)	0.07049 (1.219)	0.07073 (3.009)	0.05136 (1.06)	0.05505 (2.065)	0.05121 (1.261)	0.06298 (2.158)	0.04124 (1.604)
R-pim	0.0176 (0.3157)	0.01881 (0.3028)	0.03881 (0.585)	0.02553 (0.4097)	0.02229 (0.5297)	0.03399 (0.841)	0.02237 (0.8237)	0.02004 (0.5656)	0.02692 (0.4194)	0.02756 (0.4884)	0.0276 (1.185)	0.01997 (0.4226)	0.02139 (0.9033)	0.01985 (0.5023)	0.02435 (0.9001)	0.01603 (0.6371)
CC1/2	0.999 (0.793)	0.999 (0.912)	0.999 (0.437)	0.999 (0.675)	0.999 (0.634)	0.999 (0.435)	0.999 (0.449)	1 (0.516)	0.999 (0.567)	0.999 (0.563)	0.999 (0.481)	0.999 (0.731)	0.999 (0.487)	0.999 (0.677)	0.999 (0.503)	1 (0.821)
CC*	1 (0.941)	1 (0.977)	1 (0.78)	1 (0.898)	1 (0.881)	1 (0.778)	1 (0.787)	1 (0.825)	1 (0.851)	1 (0.849)	1 (0.806)	1 (0.919)	1 (0.809)	1 (0.899)	1 (0.818)	1 (0.949)
Reflections used in refinement	175538 (16286)	156229 (15423)	152428 (14763)	156066 (15240)	152261 (15109)	159769 (15505)	161339 (15858)	161075 (15879)	164659 (15489)	156532 (15331)	150733 (14792)	155788 (15251)	164907 (15897)	156643 (15373)	170162 (16212)	127195 (12468)
Reflections used for R-free	8467 (785)	7528 (753)	7387 (789)	7529 (746)	7382 (806)	7692 (715)	7773 (742)	7756 (732)	7945 (720)	7552 (753)	7322 (801)	7517 (758)	7953 (740)	7553 (745)	8199 (747)	6117 (587)
R-work	0.1325 (0.2546)	0.1368 (0.2031)	0.1570 (0.3514)	0.1464 (0.2853)	0.1475 (0.3037)	0.1621 (0.3455)	0.1542 (0.3530)	0.1513 (0.3271)	0.1439 (0.3108)	0.1494 (0.3175)	0.1515 (0.3156)	0.1451 (0.2797)	0.1604 (0.3734)	0.1541 (0.3299)	0.1458 (0.3256)	0.1526 (0.2818)
R-free	0.1483 (0.2615)	0.1574 (0.2061)	0.1793 (0.3576)	0.1660 (0.2755)	0.1682 (0.3004)	0.1825 (0.3653)	0.1723 (0.3430)	0.1696 (0.3369)	0.1622 (0.3162)	0.1678 (0.3161)	0.1709 (0.3174)	0.1623 (0.2761)	0.1779 (0.3796)	0.1742 (0.3327)	0.1624 (0.3212)	0.1733 (0.2896)
CC(work)	0.972 (0.916)	0.973 (0.948)	0.973 (0.697)	0.971 (0.861)	0.972 (0.854)	0.968 (0.710)	0.970 (0.740)	0.971 (0.786)	0.972 (0.809)	0.971 (0.800)	0.971 (0.769)	0.972 (0.886)	0.968 (0.766)	0.969 (0.862)	0.971 (0.792)	0.970 (0.914)
CC(free)	0.961 (0.906)	0.960 (0.949)	0.959 (0.656)	0.960 (0.881)	0.959 (0.849)	0.959 (0.699)	0.956 (0.776)	0.960 (0.781)	0.961 (0.854)	0.963 (0.799)	0.961 (0.777)	0.959 (0.889)	0.955 (0.765)	0.954 (0.856)	0.964 (0.825)	0.957 (0.877)
Number of non-hydrogen atoms	3780	3874	3890	3898	3702	3973	3804	3805	3826	3795	3935	3812	3947	3760	3778	3896
-macromolecules	3253	3363	3389	3383	3195	3508	3303	3314	3323	3294	3451	3318	3497	3279	3278	3409
-ligands	38	53	40	66	34	48	43	37	37	37	37	68	37	40	40	41
- solvent	504	482	476	478	485	437	477	468	483	478	461	450	427	456	478	465
Protein residues	337	337	337	337	337	337	337	337	337	337	337	337	337	337	337	337
RMS (bonds, Å)	0.042	0.041	0.023	0.017	0.006	0.037	0.091	0.004	0.109	0.005	0.006	0.006	0.006	0.006	0.069	0.054
RMS (angles, °)	1.02	1.14	0.99	1.01	0.78	1.47	1.57	0.74	2.19	0.74	0.79	0.77	0.77	0.78	2.15	2.05
Ramachandran favored (%)	99.4	99.4	99.4	99.7	99.4	99.4	99.4	99.4	99.4	99.4	99.4	99.4	99.1	99.4	99.1	99.1
Ramachandran allowed (%)	0.6	0.6	0.6	0.3	0.6	0.6	0.6	0.6	0.6	0.6	0.6	0.6	0.9	0.6	0.9	0.9
Ramachandran outliers (%)	0	0	0	0	0	0	0	0	0	0	0	0	0	0	0	0
Rotamer outliers (%)	1.42	1.09	1.63	1.09	1.74	1.05	1.39	1.66	1.11	1.12	2.13	1.39	1.58	1.97	1.12	1.08
Clashscore	1.07	2.35	1.9	1.6	2.01	1.97	1.05	1.94	1.34	1.36	1.87	2.24	1.56	1.97	1.51	1.89
Average B-factor (Å^2)	15.28	13.84	16.16	15.45	17.55	16.68	17.99	17.3	15.08	16.72	16.86	16.9	18.79	18.48	16.41	19
- macromolecules	13.3	12.25	14.39	13.8	15.6	15.38	16.27	15.68	13.39	14.96	15.22	15.25	17.48	16.77	14.79	17.35
- ligands	12.23	11.58	12.8	12.29	20.8	15.07	15.7	12.27	8.89	14.09	16.91	17.01	15.66	14.91	12.87	17.52
-solvent	28.24	25.05	28.92	27.31	30.23	27.28	30.05	29.02	26.95	28.92	29.13	29.1	29.65	30.98	27.72	31.17
