# Supplementary material for: Expanding automated multiconformer ligand modeling to macrocycles and fragments
Source: eLife. 2025 Jun 30;14:RP103797. doi: 10.7554/eLife.103797 (PMC12208665; doi:10.7554/eLife.103797)
Supplement: Supplementary file 7. [file elife-103797-supp7.xlsx]

## Sheet: Sheet1
PDB	Resolution	Ligand Name	Ligand Molecular Weight	Deposited RSCC	Deposited Strain	Deposited EDIAm	Modified True Positive RSCC	Modified True Positive Strain	Modified True Positive EDIAm	qFit-ligand RSCC	qFit-ligand Strain	qFit-ligand EDIAm
8P77	1.8	I73	394.513	0.77	3.88	0.49	0.74	3.98	0.29	0.8	3.15	0.46
8P70	2	X4Q	350.461	0.79	7.51	0.65	0.78	7.53	0.61	0.84	6.02	0.69
8P6X	1.9	NS9	385.46	0.72	9.57	0.65	0.7	9.5	0.64	0.8	7.23	0.67
8P78	1.9	1QK	397.494	0.69	1.56	0.48	0.67	1.5	0.21	0.72	1.24	0.34
